# Supplementary material for: Proteomic profiling reveals CDK6 upregulation as a targetable resistance mechanism for lenalidomide in multiple myeloma
Source: PubMed Central journal article supplement (PMC8866544; doi:10.1038/s41467-022-28515-1), 2022-02-23
Supplement: 41467_2022_28515_MOESM1_ESM.pdf [file 41467_2022_28515_MOESM1_ESM.pdf]

# Supplementary Figure 1

| Analysis                        | Patient # | Sample Time point   | Ig-Type    | FISH Diagnosis                                  | Treatment                                                                                                   | Time between samples (months) | FISH Relapse                                         |
|---------------------------------|-----------|---------------------|------------|-------------------------------------------------|-------------------------------------------------------------------------------------------------------------|-------------------------------|------------------------------------------------------|
| Proteomics, RNA seq, WES ID #16 | 1         | Diagnosis + Relapse | IgA lambda | t(14;16), +17p13, penta 1q21, +1p32, tetra 9q34 | Len / Dex                                                                                                   | 28                            | t(14;16), +17p13, tetra 1q21, +1p32, +9q34, del13q14 |
| Proteomics, RNA seq             | 2         | Diagnosis + Relapse | IgG kappa  | +9q34, +1q21                                    | Len / Dox / Dex<br>HD-Mel+ Auto-SCT<br>Len maintenance                                                      | 24                            | +9q34, tetra 1q21                                    |
| Proteomics, RNA seq, WES ID #14 | 3         | Diagnosis + Relapse | kappa      | t(11;14)                                        | Len / Dex/ HD-Mel+ Auto-SCT<br>Len maintenance                                                              | 19                            | t(11;14), +1q21                                      |
| Proteomics, RNA seq, WES ID #9  | 4         | Diagnosis + Relapse | lambda     | t(11;14)                                        | Len / Dex                                                                                                   | 33                            | t(11;14)                                             |
| Proteomics, RNA seq, WES ID #1  | 5         | Diagnosis+ Relapse  | IgA kappa  | t(4;14) , +1q21, del13q14                       | Mel / Pred<br>Len / Dex<br>Bort / Dex<br>Pom / Dex/ HD-Mel+ Auto-SCT                                        | 46                            | t(4;14) , +1q21, del13q14                            |
| Immunoblot                      | 6         | Diagnosis           | lambda     | t(4;14), +1q21, del13q                          |                                                                                                             |                               |                                                      |
| Immunoblot                      | 7         | Diagnosis           | IgG lambda | t(4;14), del 13q                                |                                                                                                             |                               |                                                      |
| Immunoblot                      | 8         | Diagnosis           | lambda     | t(11;14)                                        |                                                                                                             |                               |                                                      |
| Immunoblot                      | 9         | Diagnosis           | kappa      | t(11;14), del17p13, del13q14                    |                                                                                                             |                               |                                                      |
| Immunoblot                      | 10        | Relapse             | IgG lambda |                                                 | B/ HD-Mel+ Auto-SCT/<br>DRD                                                                                 |                               | t(4;14), del13q14, +1q21                             |
| Immunoblot                      | 11        | Relapse             | IgA kappa  |                                                 | BCD/ HD-Mel+auto<br>Len / Dex                                                                               |                               | +9q34.2, +1q21, +17p13.1                             |
| Immunoblot                      | 12        | Relapse             | IgA kappa  |                                                 | Carf / Mel / Pred<br>Len / Pred                                                                             |                               | +9q34                                                |
| Immunoblot                      | 13        | Relapse of #8       | lambda     |                                                 | BCD/ HD-Mel+ Auto-SCT<br>Len / Dex<br>Carf / Dex/ HD-Mel+ Auto-SCT<br>Len / Bort / Dex<br>Dara<br>Pom / Dex |                               | t(11;14)                                             |
| Immunoblot                      | 14        | Relapse             | IgA lambda |                                                 | Len / Bort / Dex<br>2x HD-Mel+ Auto-SCT                                                                     |                               | t(14;16), tetra 1q, del13q,                          |
| Immunoblot                      | 15        | Relapse of #7       | IgG lambda |                                                 | ID/ 2x HD-Mel+ Auto-SCT                                                                                     |                               | t(4;14), del 13q                                     |
| Immunoblot                      | 16        | Relapse             | IgG lambda |                                                 | BCD/ 2x HD-Mel+ Auto-SCT/B<br>DRD                                                                           |                               | t(4;14), +1q21, del13q,                              |
| Immunoblot                      | 17        | Relapse             | IgA lambda |                                                 | Bort / Thal / Dex / Cis /<br>Dox / CP / E                                                                   |                               | tetra 1q21, +13q14, del17p, t(14;16)                 |
| Immunoblot                      | 18        | Relapse             | IgG lambda |                                                 | BCD/ HD-Mel+ Auto-SCT/B<br>Len maintenance<br>Vor / Dex / Dara                                              |                               | +9q34                                                |

BCD= bortezomib/ cyclophosphamide/ dexamethasone; Bort = bortezomib; Carf = carfilzomib; Cis = cisplatin; CP = cyclophosphamide; Dara = daratumumab; Dex = dexamethasone; Dox = doxorubicin; DRD= daratumumab/ lenalidomide/ dexamethasone; E = etoposide; HD-Mel+ Auto-SCT = High dose melphalan with autologous stem cell transplantation; ID = idarubicine/ dexamethasone; Len = lenalidomide; Mel = melphalan; Pom = pomalidomide; Pred = prednisone; Thal = thalidomide; Vor = Vorinostat.

**Supplementary Figure 1. Patient characteristics.** WES ID is referenced to Bohl *et al.* 2021.

## Supplementary Figure 2

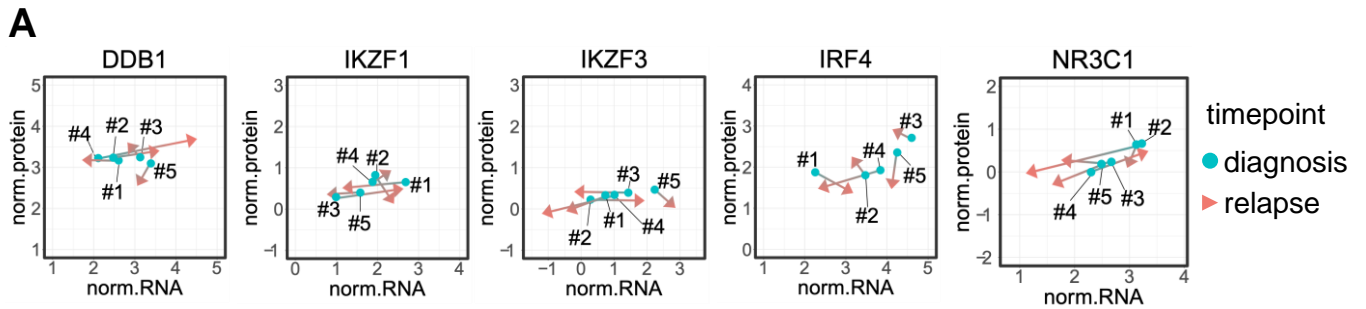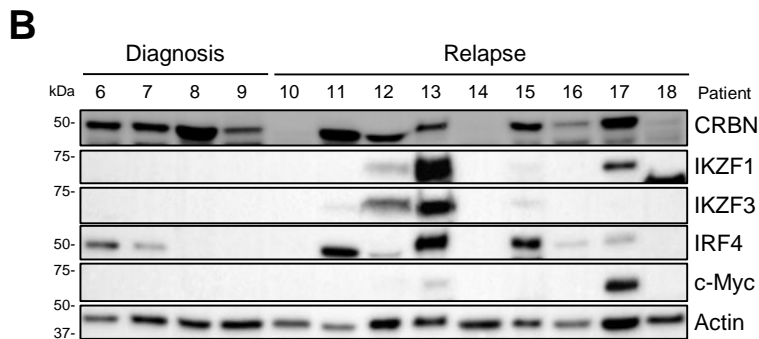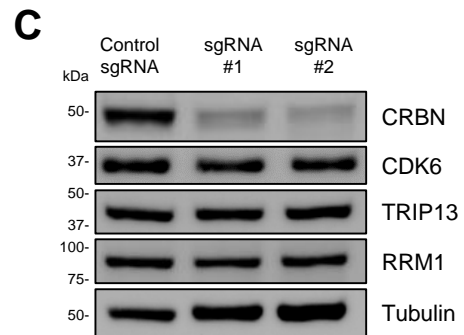

**Supplementary Figure 2. Protein and RNA expression levels of proteins involved in the mechanism of thalidomide analogs in multiple myeloma. (A)** Median normalized protein intensities (log<sub>2</sub> TMT intensities) of DDB1, IKZF1, IKZF3, IRF4 and NR3C1 in all 10 samples were plotted against their respective normalized RNA expression levels (log<sub>2</sub> TPM values). Samples from the same patient are connected. **(B)** Western blot of additional patient cohort for expression of IMiD-related proteins. (N=13 patient samples) **(C)** CRISPR/Cas9-mediated knockout of CRBN and protein levels of CDK6, TRIP13, and RRM1 detected by western blot. (N=3 biologically independent replicates)

# Supplementary Figure 3

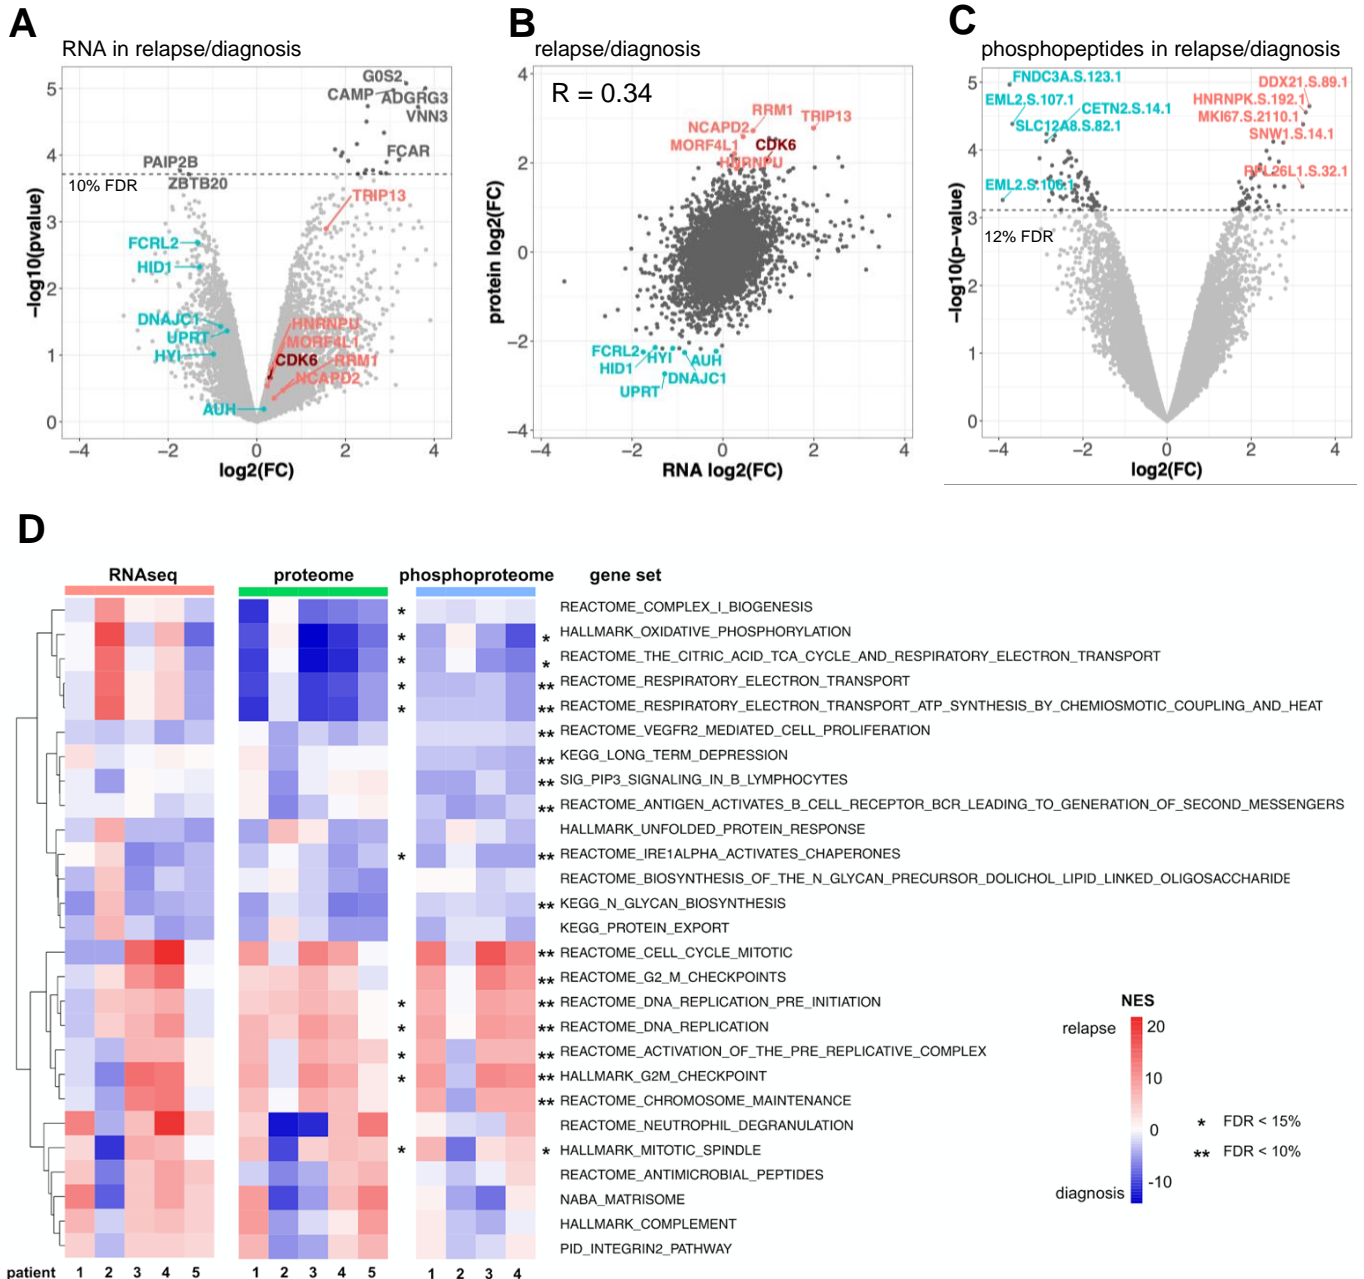

**Supplementary Figure 3. RNA sequencing, phosphoproteomic analysis, and top deregulated gene signatures in paired multiple myeloma patient samples.** (A) RNA expression changes at relapse/diagnosis were determined for each patient and analyzed with a two-sided moderated 1-sample t-test. Average log<sub>2</sub>(fold change) of each transcript is plotted against its  $-\log_{10}(\text{p-value})$ . The corresponding transcripts of the 6 most up and down regulated proteins are highlighted in color. (B) Correlation of average fold changes ( $\log_2(\text{FC})$ ) of protein and RNA expression levels. (C) Phosphopeptide abundance level changes at relapse/diagnosis were determined for each patient and analyzed with a two-sided moderated 1-sample t-test. Average  $\log_2(\text{fold change})$  of each phosphopeptide is plotted against its  $-\log_{10}(\text{p-value})$ . (D) Single sample gene set enrichment analysis (ssGSEA) of relapse/diagnosis ratios in each patient. Heatmap displays the normalized enrichment scores (NES) of the most regulated gene sets in RNAseq, global proteome and phosphoproteome datasets for each patient. Significance of terms in each dataset is indicated with stars. Significance was determined with a one-sample moderated t-test.

# Supplementary Figure 4

**A**

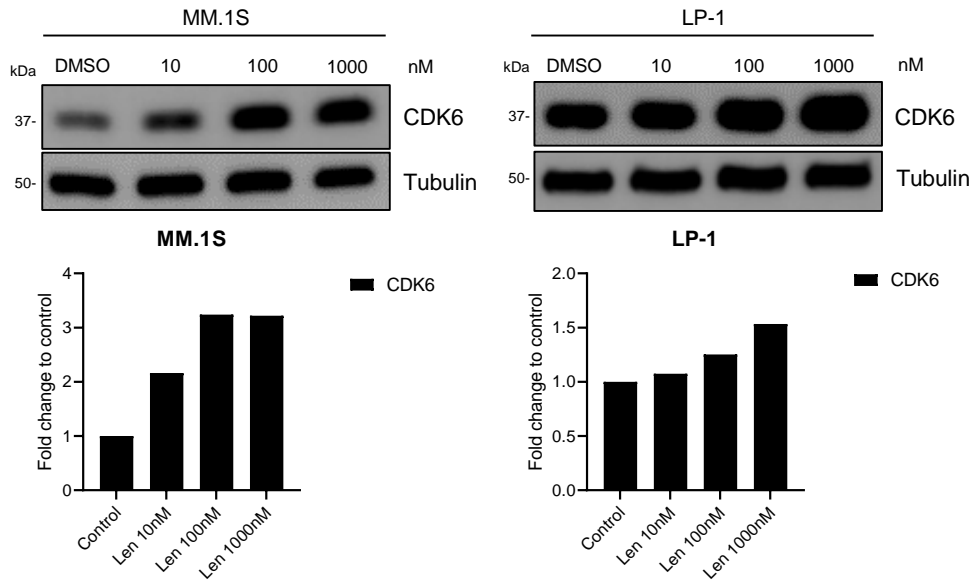

**B**

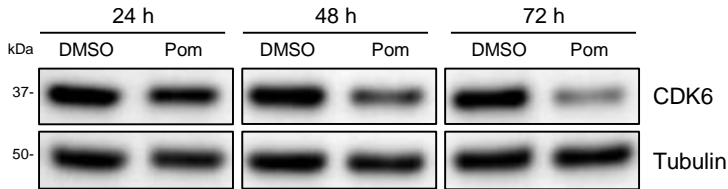

**C**

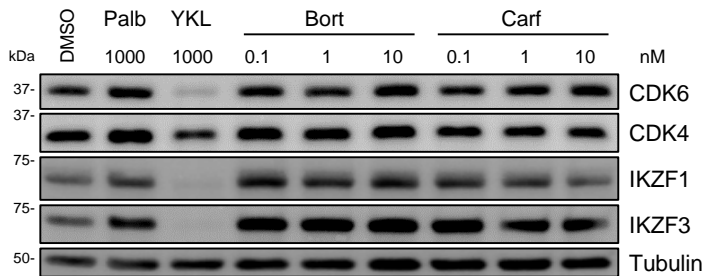

**Supplementary Figure 4. CDK6 protein levels in multiple myeloma cells treated with IMiDs and proteasome inhibitors.** Multiple myeloma cells MM.1S and LP-1 were cultured in the presence of respective concentrations of lenalidomide (len) to induce drug-resistance. (A) CDK6 protein levels of lenalidomide-resistant (lenR) cells and respective quantification. CDK6 protein levels were normalized to respective loading controls and to treatment control. (B) Treatment of MM.1S cells with 1  $\mu$ M of pomalidomide (pom) for 24, 48, or 72 h. (C) Treatment of MM.1S with palbociclib (palb), YKL-06-102 (YKL), and proteasome inhibitors bortezomib (bort) and carfilzomib (carf) at respective concentrations for 4 h. (N=3 biologically independent replicates)

# Supplementary Figure 5

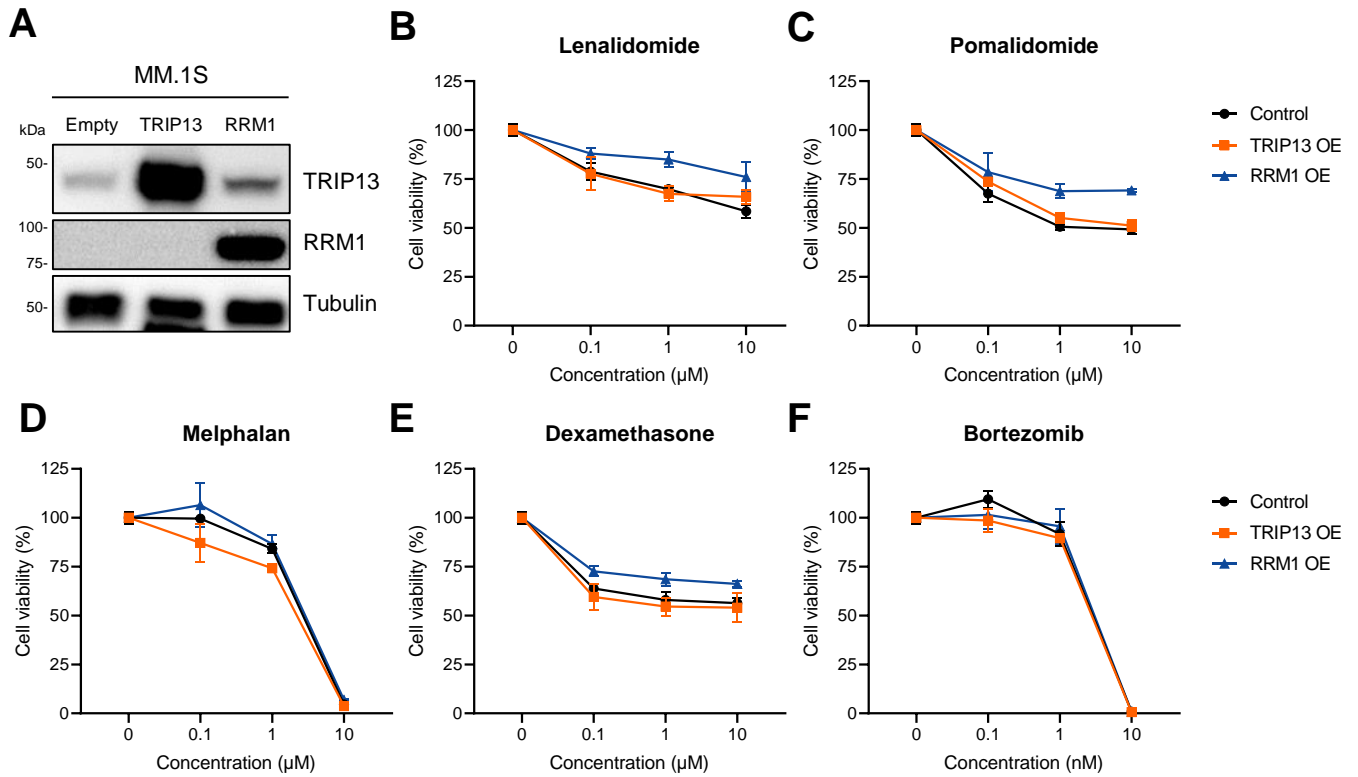

**Supplementary Figure 5. Effects of elevated TRIP13 or RRM1 protein expression on cell viability in response to multiple myeloma therapies.** (A) Overexpression of TRIP13 and RRM1 in MM.1S cells using retroviral transduction confirmed through western blot analysis. (B) Cell viability of RRM1- and TRIP13-overexpressing MM.1S cells after subjected to 96 h treatment with lenalidomide, (C) pomalidomide, (D) melphalan, (E) dexamethasone, and (F) bortezomib. (N=3 biologically independent replicates) Control denotes empty vector. Cell viability is normalized to respective DMSO conditions. Data represent the mean  $\pm$ SD of biological triplicates.

## Supplementary Figure 6

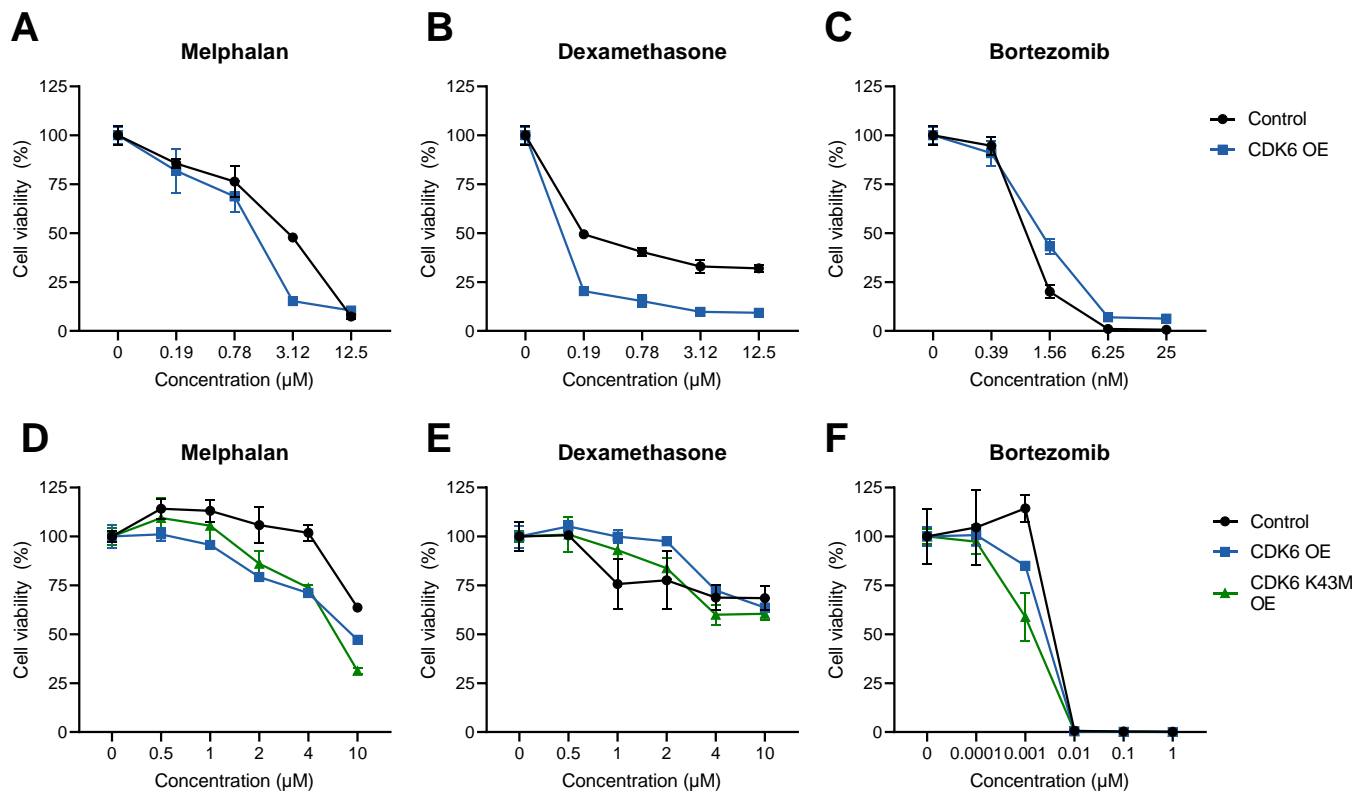

### Supplementary Figure 6. Effects of CDK6 overexpression in response to multiple myeloma therapies.

(A-C) Cell viability of 96 h treatment with melphalan, dexamethasone and bortezomib in MM.1S cells overexpressing CDK6 WT and in (D-F) OPM2 cells overexpressing CDK6 WT and CDK6 K43M mutant. (N=3 biologically independent replicates) Control denotes empty vector. Cell viability is normalized to respective DMSO conditions. Data represent the mean  $\pm$ SD of biological triplicates.

# Supplementary Figure 7

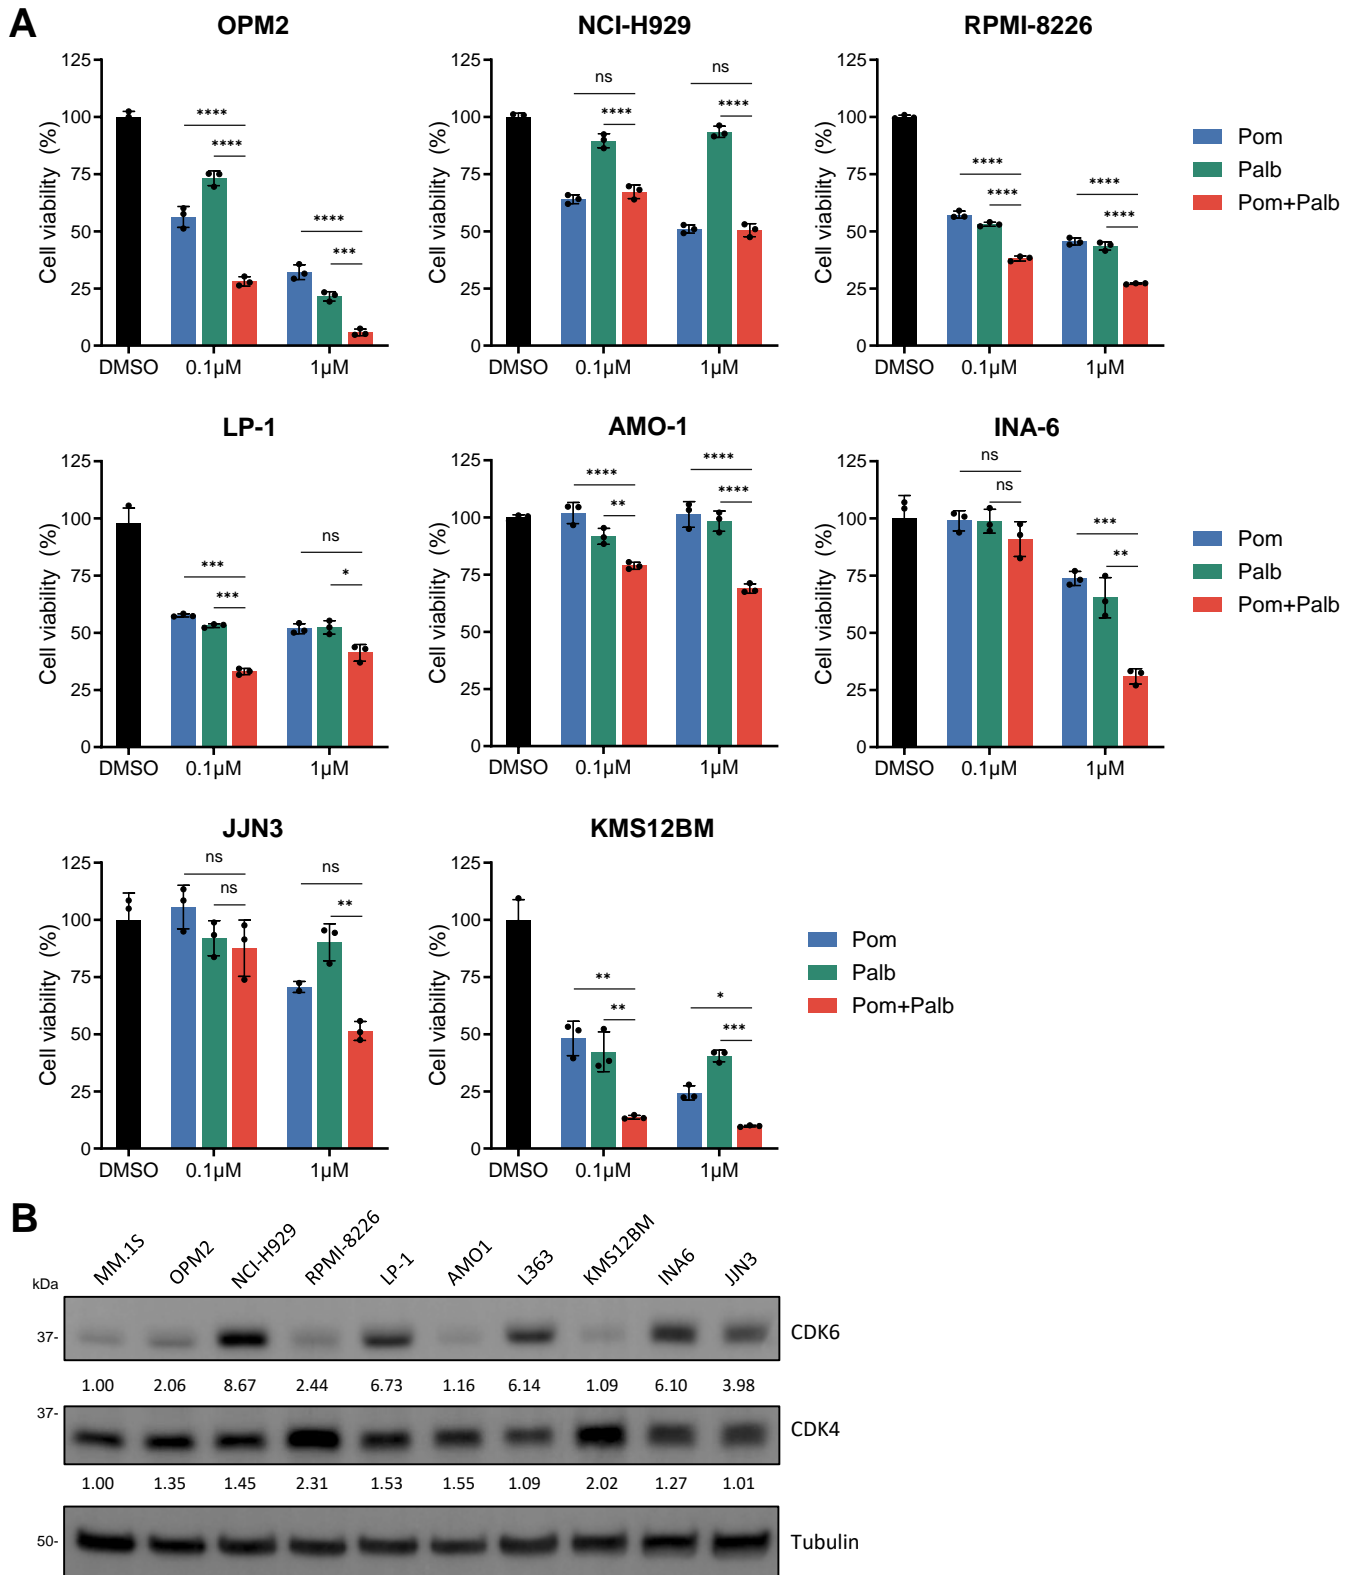

**Supplementary Figure 7. CDK6 inhibition by palbociclib sensitizes multiple myeloma cells to IMiDs.** (A) Cell viability of IMiD-sensitive and -resistant multiple myeloma cell lines when treated for 96 h with pomalidomide (pom), palbociclib (palb), and in combination (pom+palb). (N=3 biologically independent replicates) (B) Endogenous levels of CDK6 across all multiple myeloma cell lines. Cell viability is normalized to respective DMSO conditions. Data represent the mean  $\pm$ SD of biological triplicates. One-way ANOVA is applied. P values are displayed as follows: n.s. =  $P > 0.05$ ; \* =  $P \leq 0.05$ ; \*\* =  $P \leq 0.01$ ; \*\*\* =  $P \leq 0.001$ ; \*\*\*\* =  $P \leq 0.0001$ . Quantification of CDK6 and CDK4 is normalized to tubulin and to MM.1S.

# Supplementary Figure 8

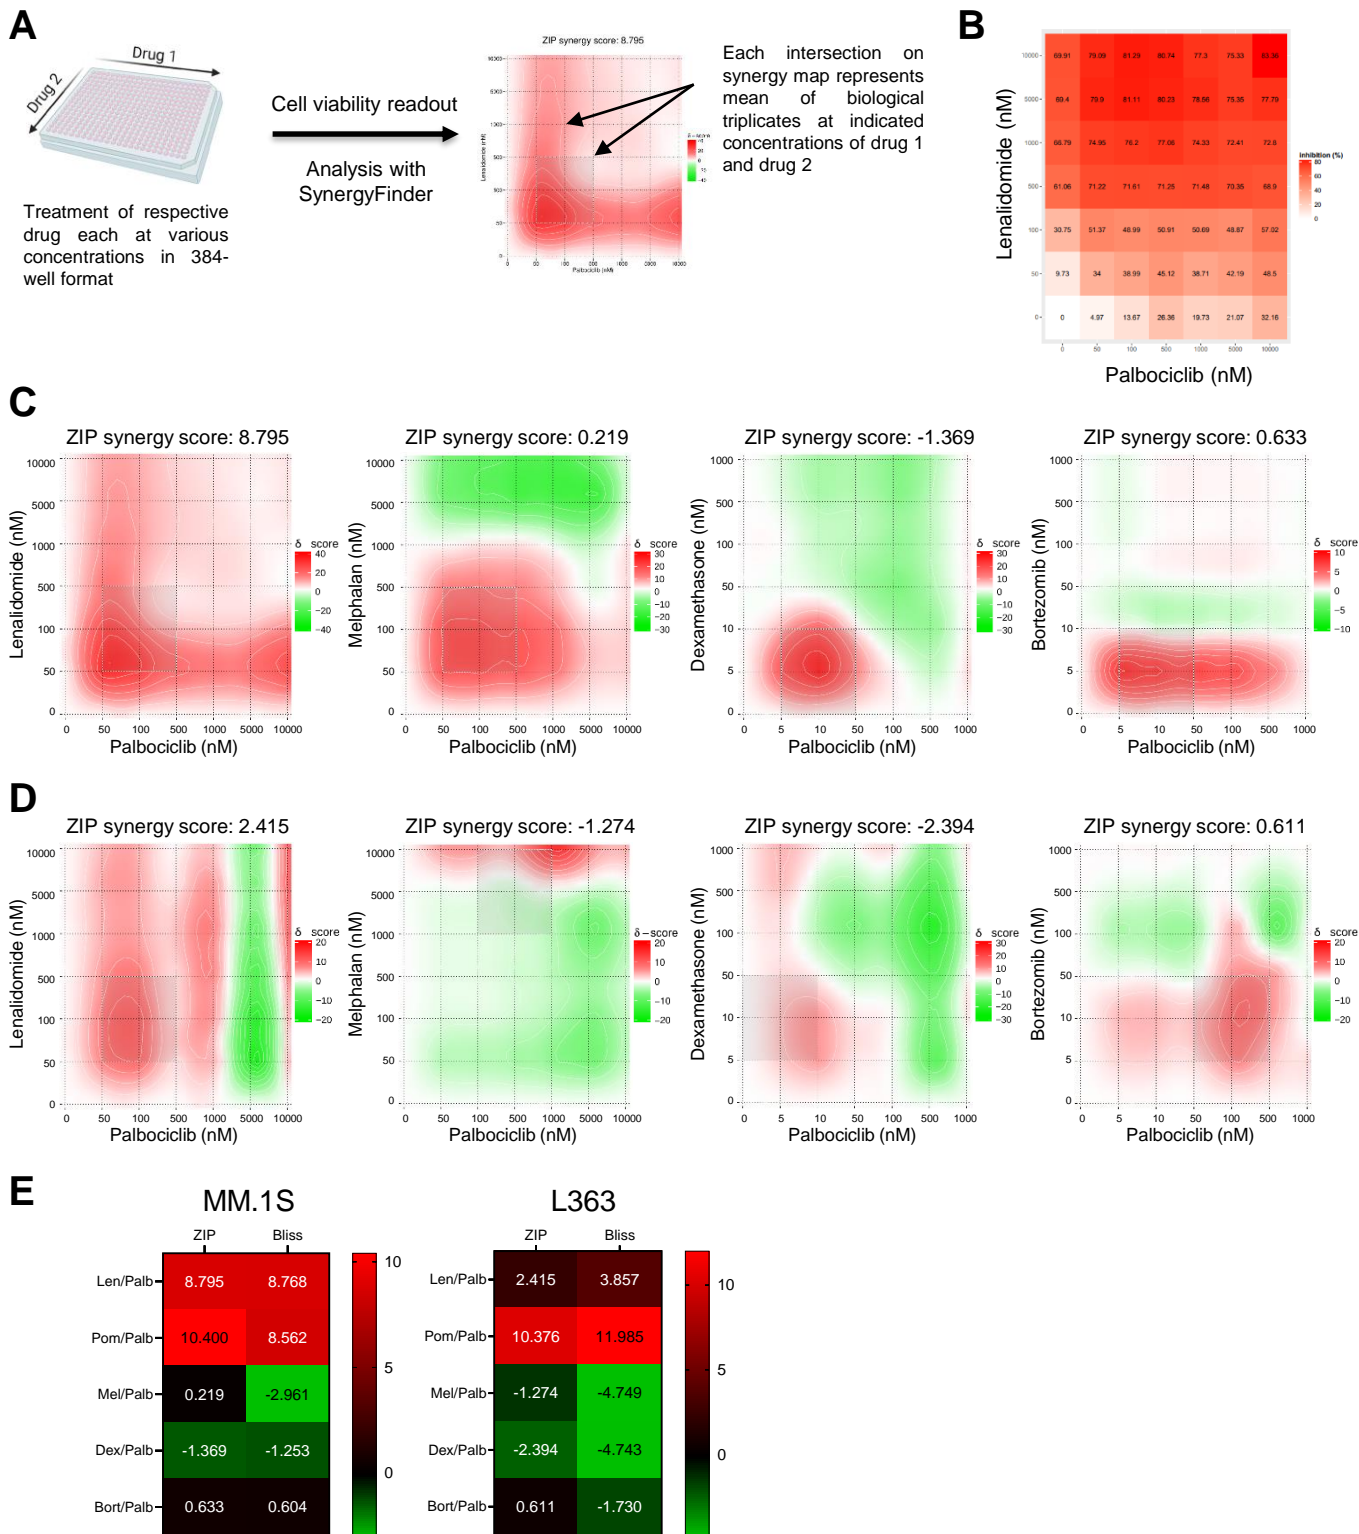

**Supplementary Figure 8. Drug synergy analyses of palbociclib with multiple myeloma drug treatments.** (A) Workflow for obtaining synergy plots. (B) MM.1S cell viability upon combination treatment of palbociclib with lenalidomide. (C) Synergy plots of 96 h treatment of palbociclib in combination with lenalidomide, melphalan, dexamethasone, and bortezomib in MM.1S and (D) L363 cells. (E) Heatmap of synergy scores of combination treatments with palbociclib. Synergy plots, ZIP score and Bliss score calculations were generated and performed with SynergyFinder.<sup>75</sup> Data is normalized to respective DMSO conditions and represent the mean of biological triplicates.



## Supplementary Figure 9

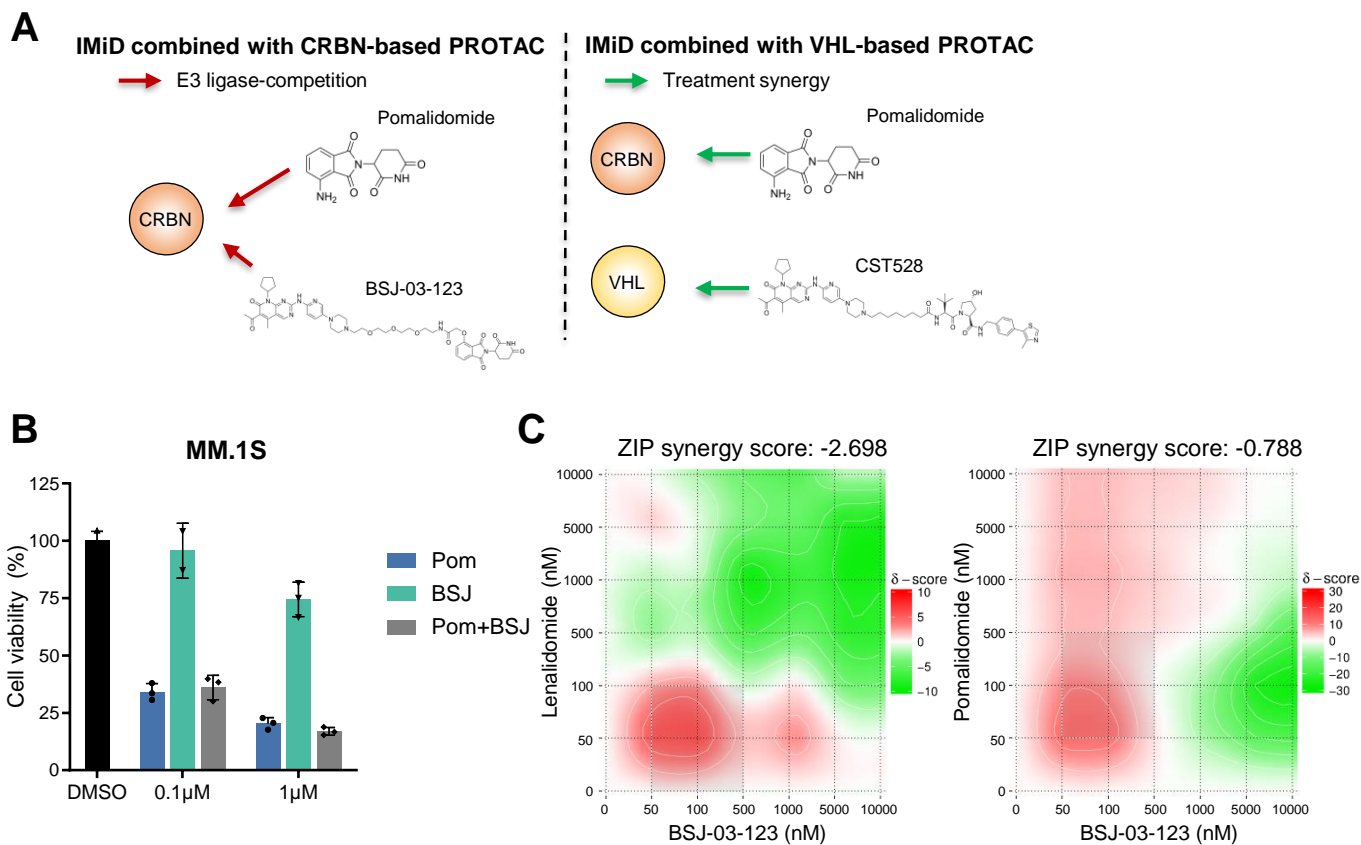

**Supplementary Figure 9. Overcoming antagonism by CRBN-based PROTACs with VHL-based CDK6 PROTAC.** (A) Schematic diagram of E3 ligase competition upon combination treatment of IMiD with CRBN-based PROTAC versus synergistic treatment with VHL-based PROTAC. (B) Cell viability of MM.1S after 96 h treatment of pomalidomide (pom), BSJ-03-123 (BSJ), or in combination (pom+BSJ). (N=3 biologically independent replicates) (C) Synergy map of MM.1S cells treated with BSJ-03-123 in combination with lenalidomide and pomalidomide. Synergy levels are indicated with ZIP synergy scores. Synergy maps were generated with SynergyFinder.<sup>75</sup> Viability data represent the mean  $\pm$ SD of biological triplicates. Synergy data represent the mean of biological triplicates.

## Supplementary Figure 10

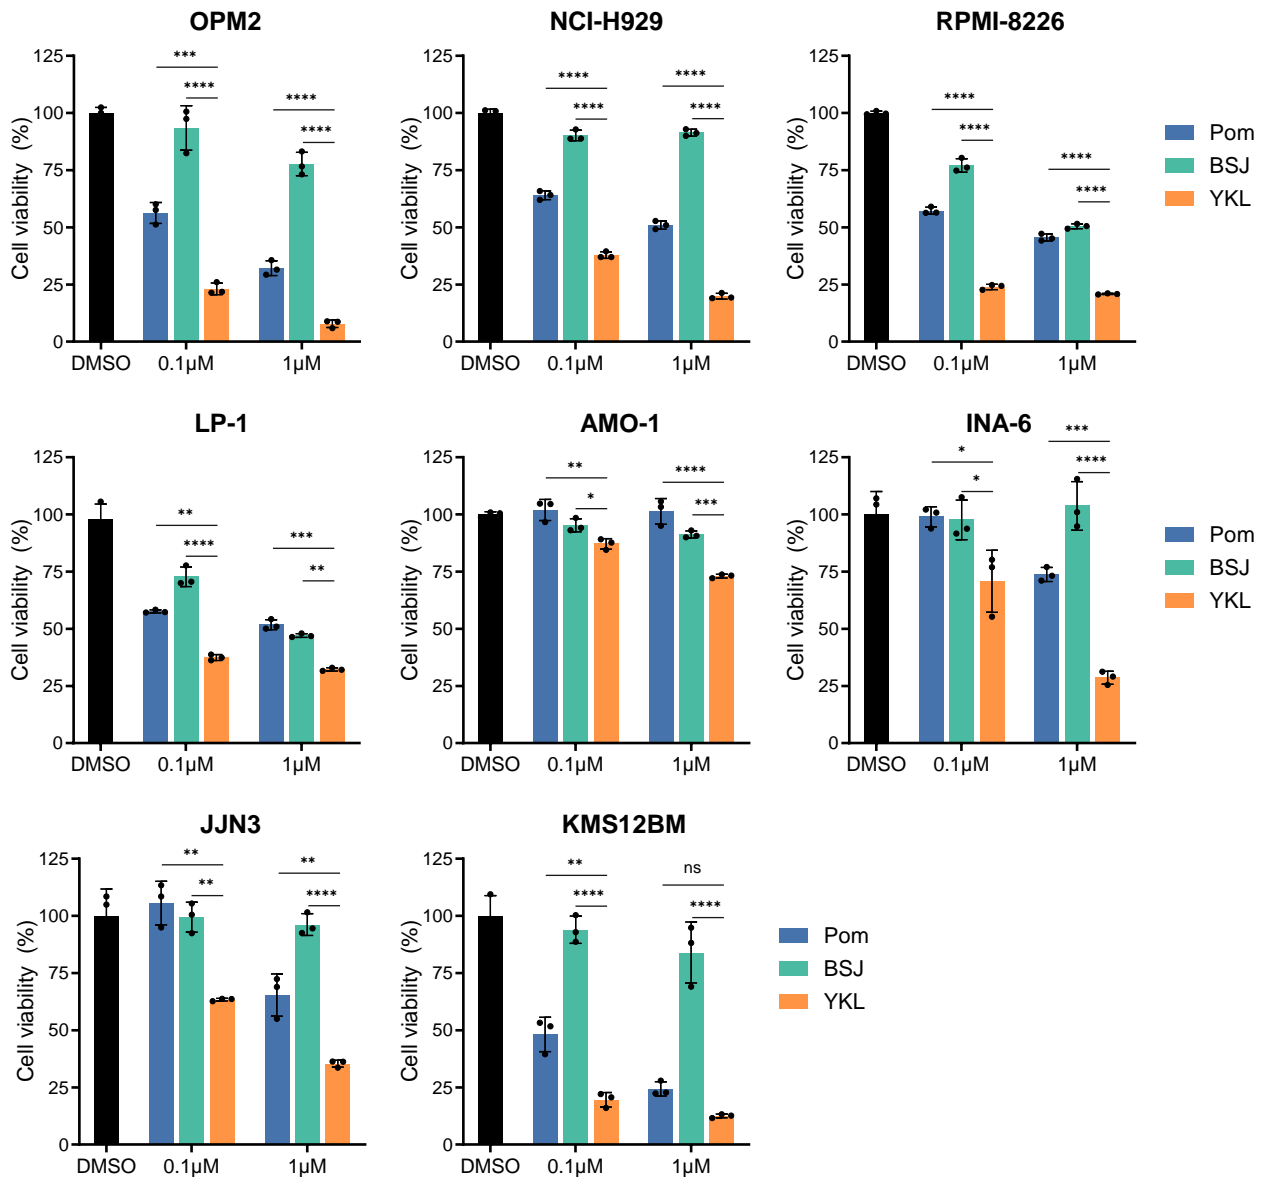

**Supplementary Figure 10. YKL-06-102 shows high level of intramolecule synergism via CDK6, IKZF1, and IKZF3 degradation.** Cell viability of IMiD-sensitive and -resistant multiple myeloma cell lines after 96 h treatment with pomalidomide (pom), BSJ-03-123 (BSJ), and YKL-06-102 (YKL). (N=3 biologically independent replicates) Cell viability is normalized to respective DMSO conditions. Data represent the mean  $\pm$ SD of biological triplicates. One-way ANOVA is applied. P values are displayed as follows: n.s. = P > 0.05; \* = P ≤ 0.05; \*\* = P ≤ 0.01; \*\*\* = P ≤ 0.001; \*\*\*\* = P ≤ 0.0001.

## Supplementary Figure 11

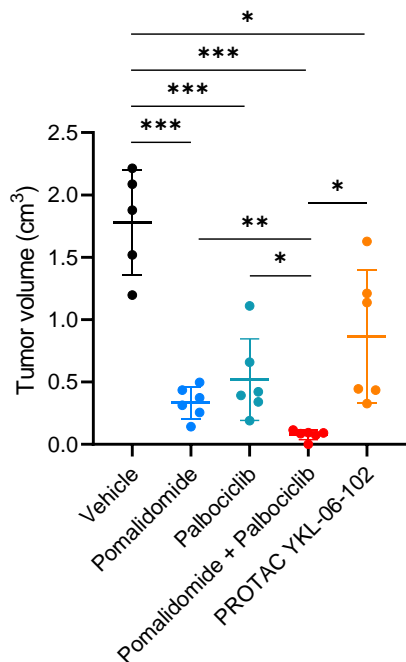

**Supplementary Figure 11. *In vivo* effects of pomalidomide, CDK6 inhibition and CDK6/IKZF1/IKZF3-targeting PROTAC.** Tumor size on day 9. Differences in tumor volumes were analyzed by unpaired t-tests with Welch's correction. Data represent the mean  $\pm$ SD of biological replicates. Group size: n=5 for vehicle group; n=6 for pomalidomide treatment group; n=6 for palbociclib treatment group; n=6 for pomalidomide + palbociclib treatment group; n=6 for YKL-06-102 treatment group. P values are displayed as follows: \* =  $P \leq 0.05$ ; \*\* =  $P \leq 0.01$ ; \*\*\* =  $P \leq 0.001$ .

## Supplementary Figure 12

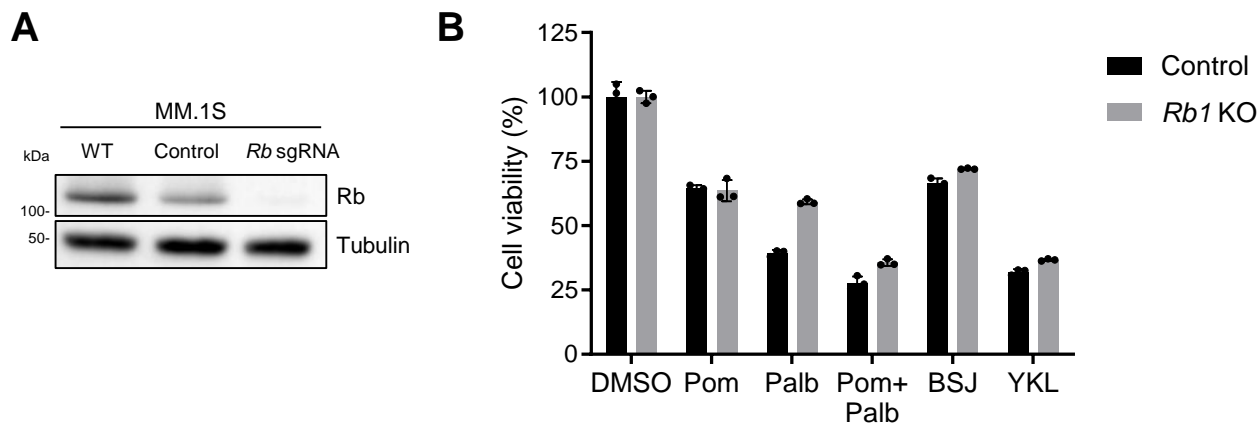

**Supplementary Figure 12. Combination treatment is independent of *Rb1*.** (A) Western blot analysis for confirmation of CRISPR/Cas9-mediated knockout of *Rb1* in MM.1S cells. (B) Cell viability of various single or combined treatments in MM.1S control or *Rb1* KO cells at 1  $\mu$ M each. Cells were treated for 96 h with pomalidomide (pom), palbociclib (palb), in combination (pom+palb), BSJ-03-123 (BSJ), and YKL-06-102 (YKL). (N=3 biologically independent replicates) Control denotes Cas9- cells transduced with luciferase sgRNA. Cell viability is normalized to respective DMSO conditions. Data represent the mean  $\pm$ SD of biological triplicates.

# Supplementary Figure 13

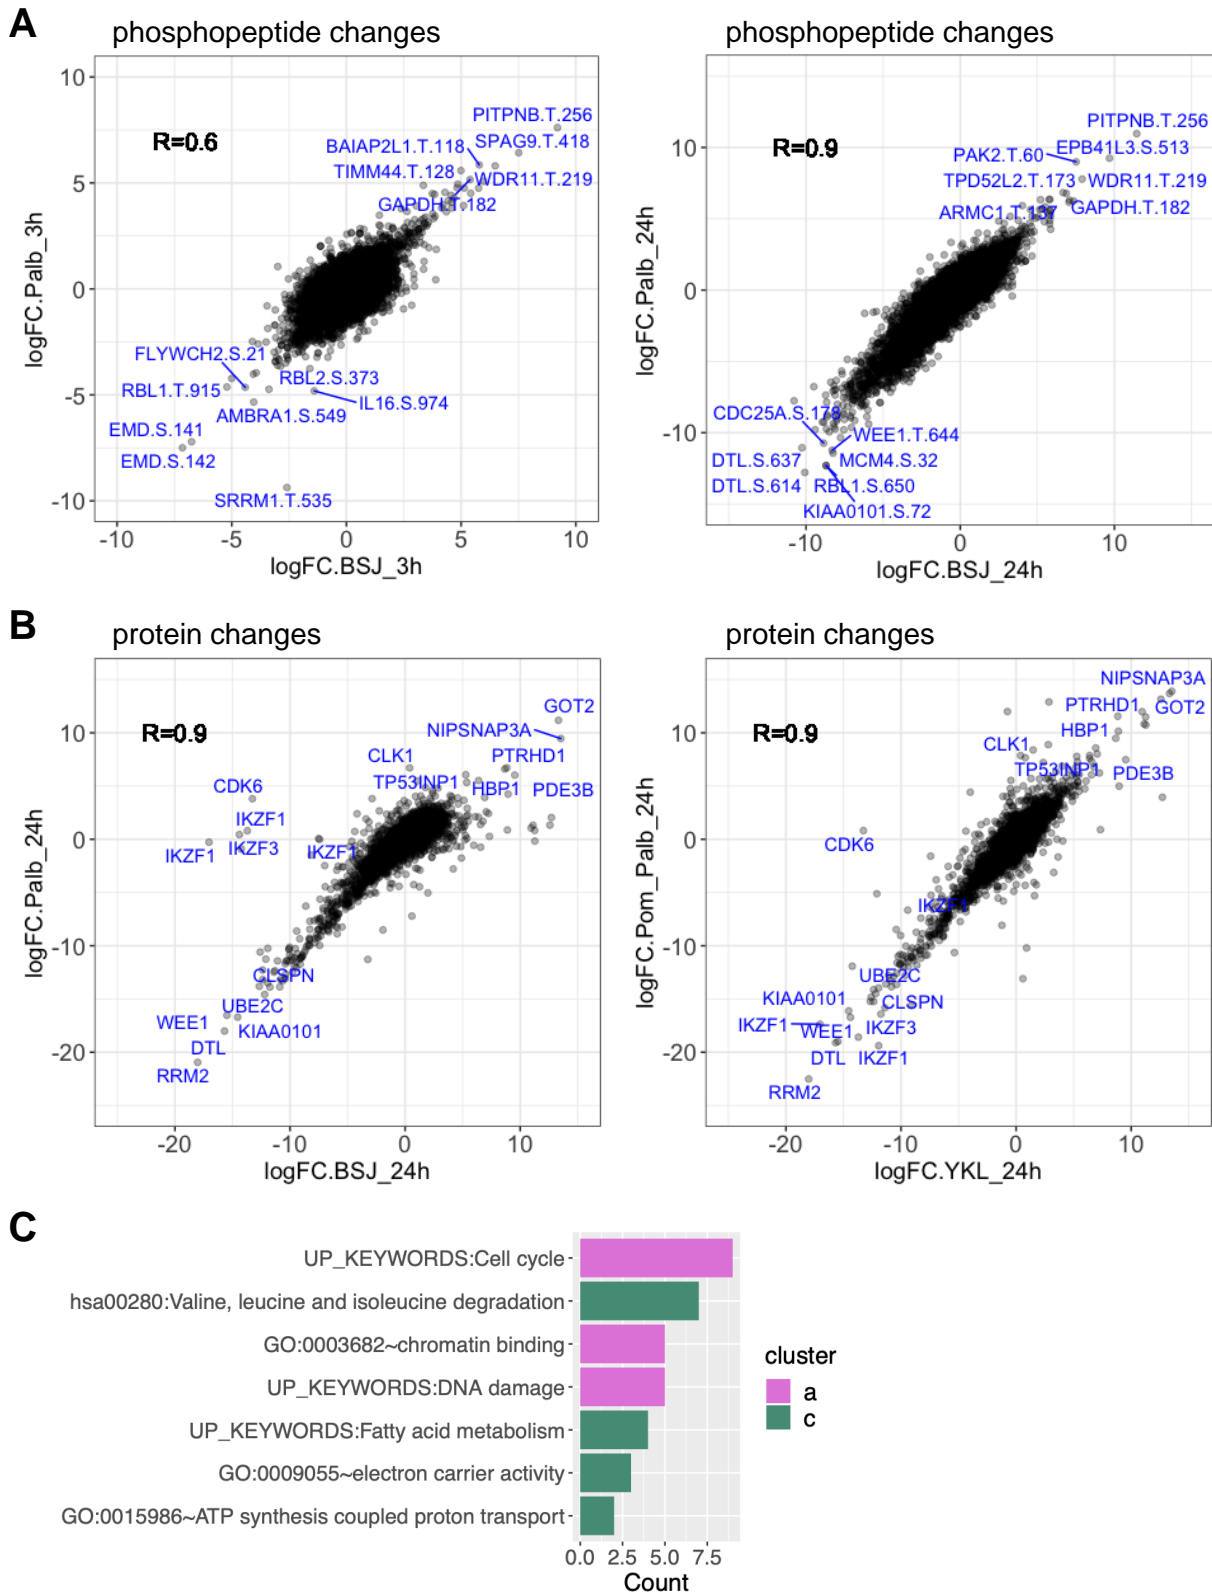

**Supplementary Figure 13. Correlation of CDK6 inhibition by palbociclib and CDK6 degradation by PROTACs.** MM.1S cells were treated for 3 h or 24 h as indicated. Dotplots show correlation of fold changes of (A) phosphopeptides or (B) proteins relative to control treated cells. (C) Representative GO annotation of proteins in cluster a and cluster c of Figure 6B. Pom = pomalidomide; Palb = palbociclib; BSJ = BSJ-03-123; YKL = YKL-06-102.

# Supplementary Figure 14

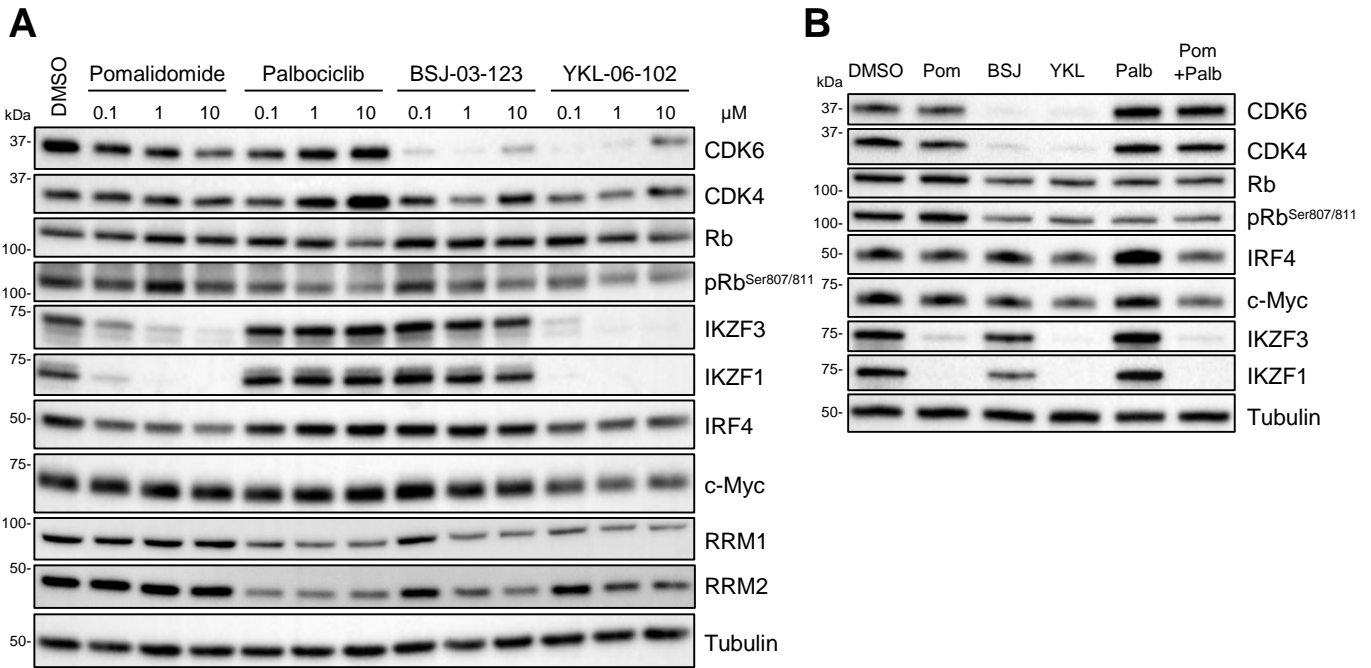

**Supplementary Figure 14. Protein analyses of multiple myeloma cells treated with pomalidomide, CDK6 inhibitors and PROTACs.** (A) Western blot analysis of OPM2 cells treated for 16 h with pomalidomide, palbociclib, BSJ-03-123, and YKL-06-102 at indicated concentrations. (N=3 biologically independent replicates) (B) Western blot analysis of MM.1S cells after subjected to respective drug treatments at 1  $\mu\text{M}$  for 16 h. Cells were treated with pomalidomide (pom), palbociclib (palb), in combination (pom+palb), BSJ-03-123 (BSJ), and YKL-06-102 (YKL). (N=3 biologically independent replicates)

# Supplementary Figure 15

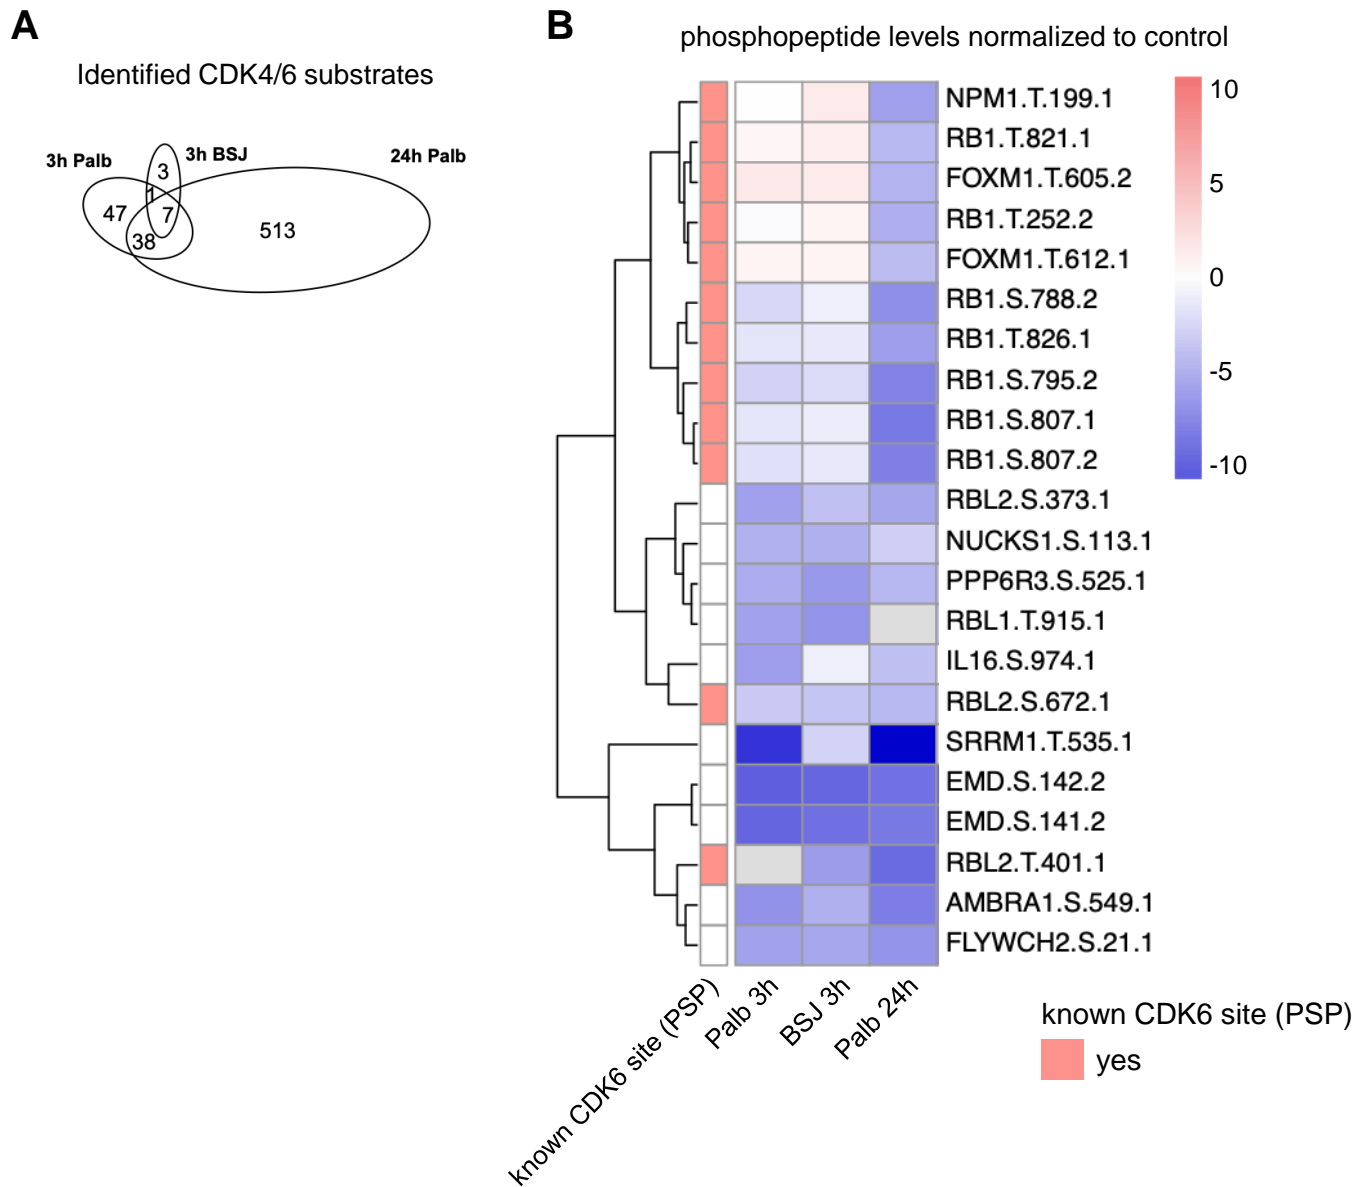

**Supplementary Figure 15. Phosphoproteomic analysis of drug-treated MM.1S cells identifies potential CDK4/6 substrates in multiple myeloma cells.** (A) Overlap of putative CDK4/6 substrates in MM.1S cells. (B) Fold change relative to control of most regulated phosphopeptides and known CDK6 targets from phosphosite plus (PSP). Palb = palbociclib; BSJ = BSJ-03-123.

# Supplementary Figure 2B

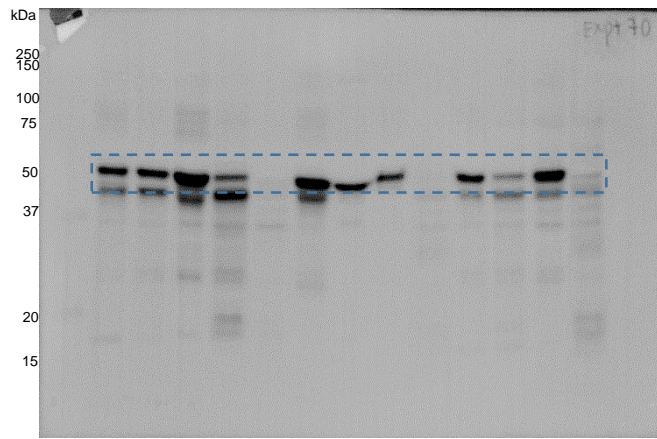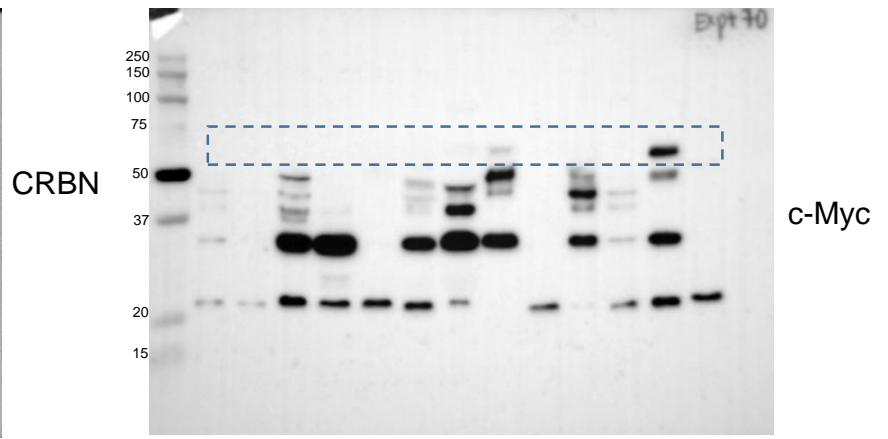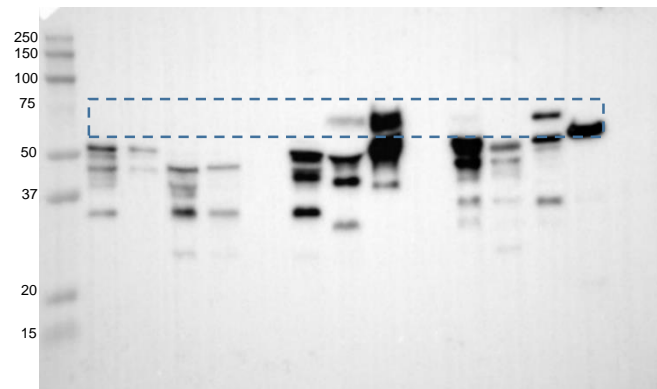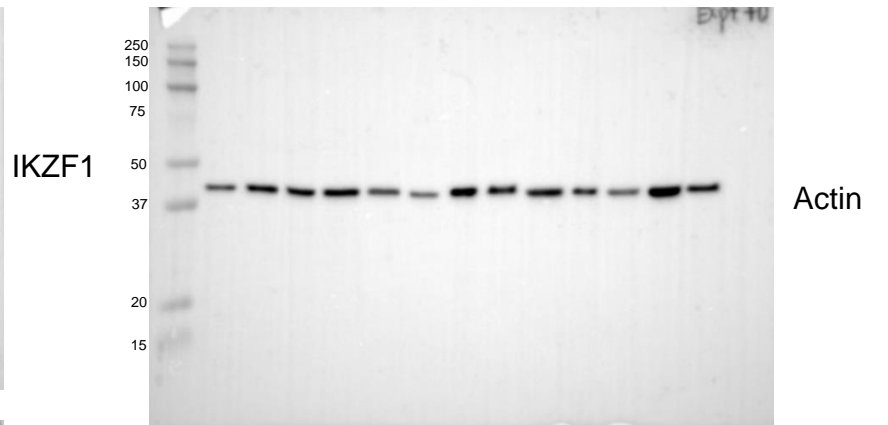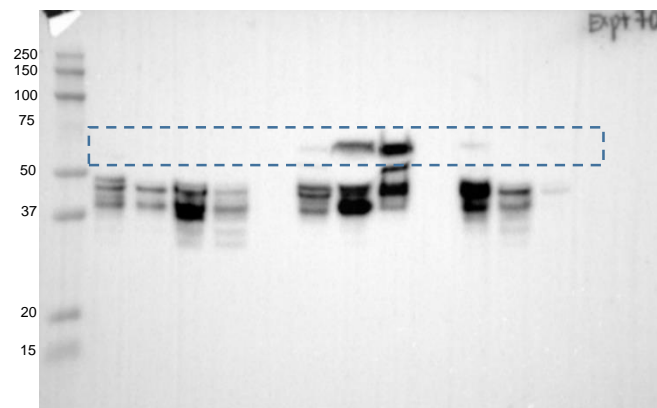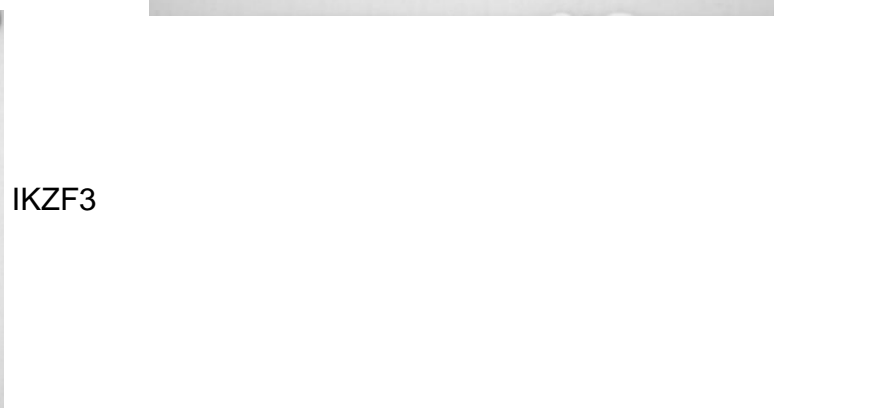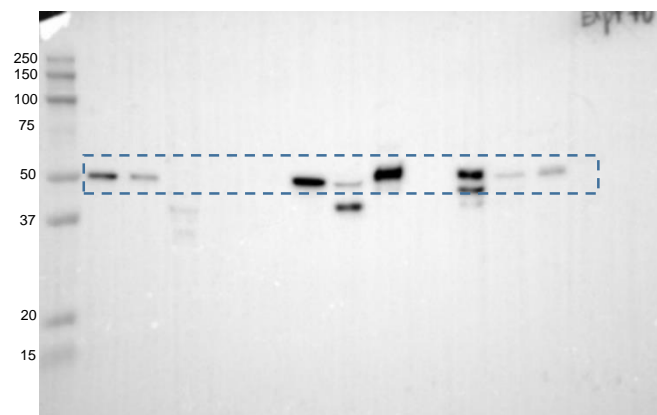



## Supplementary Figure 2C

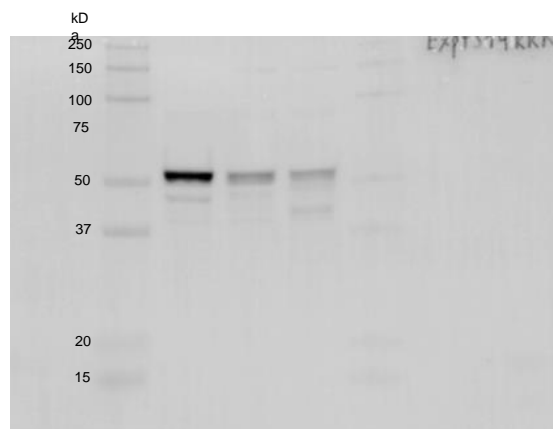

CRBN

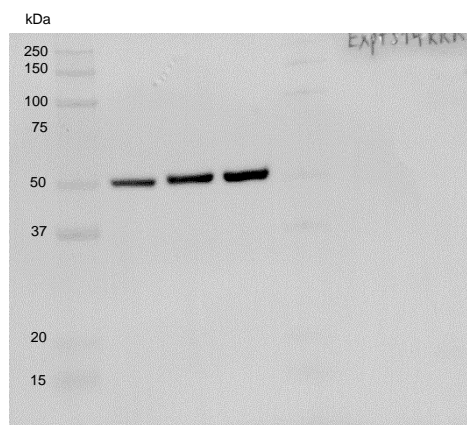

Tubulin

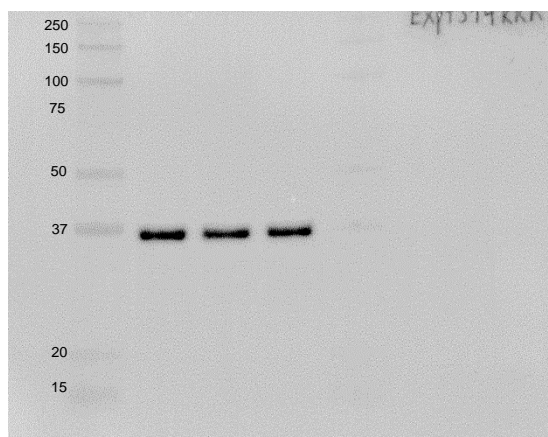

CDK6

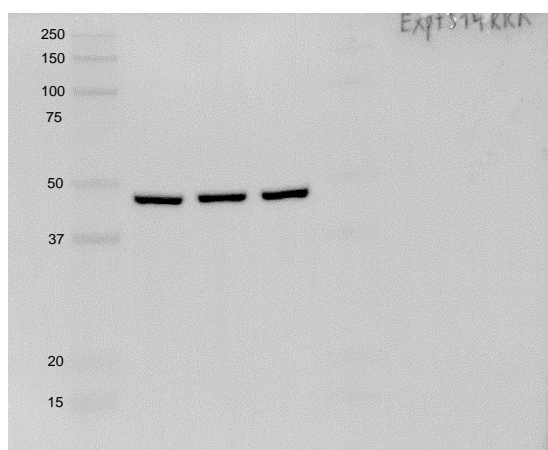

TRIP13

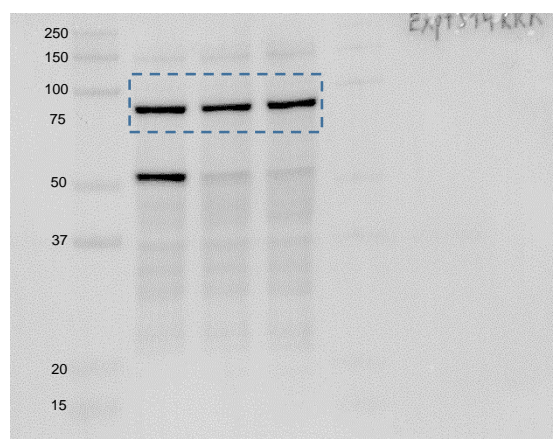

RRM1

# Supplementary Figure 4A

MM.1S LenR

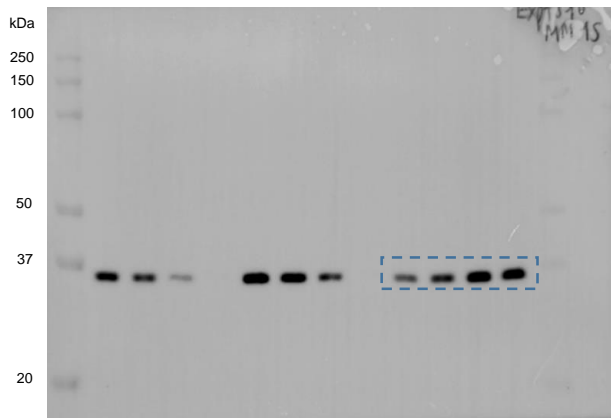

CDK6

LP-1 LenR

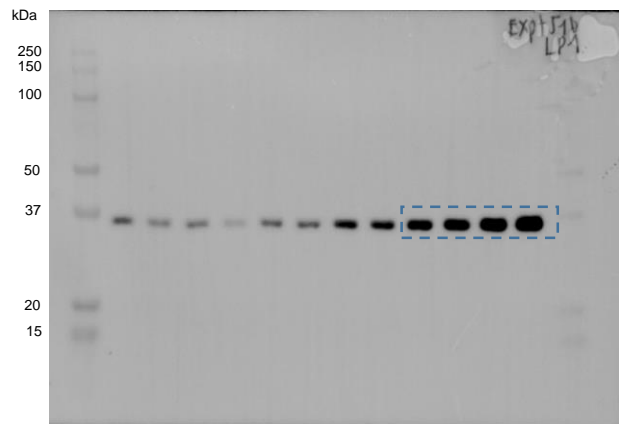

CDK6

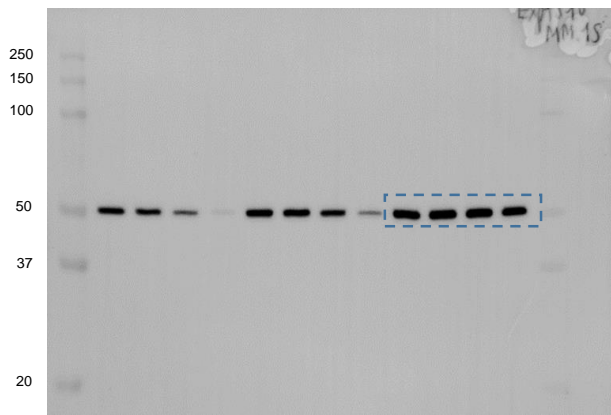

Tubulin

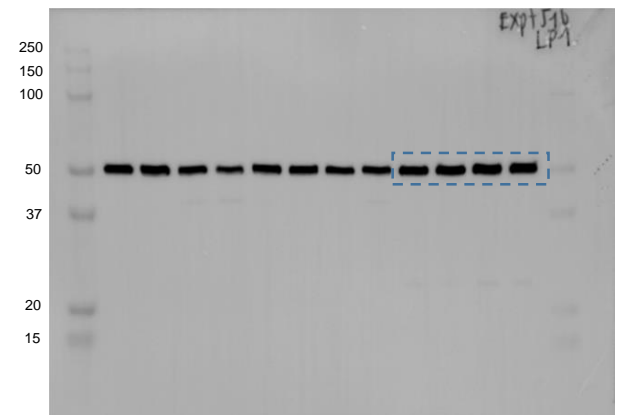

Tubulin

## Supplementary Figure 4B

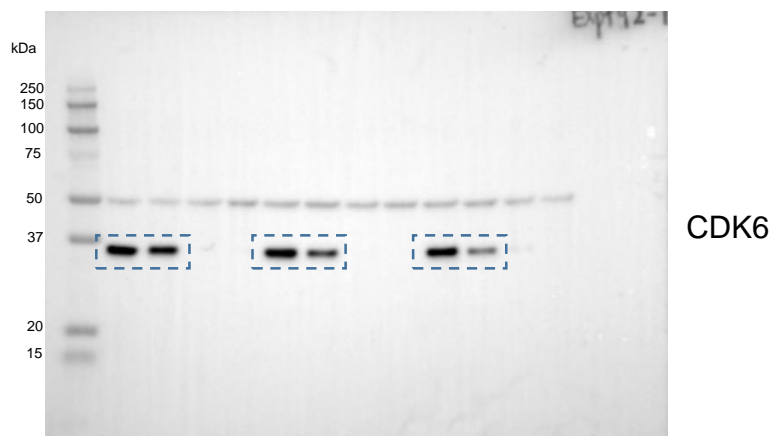

CDK6

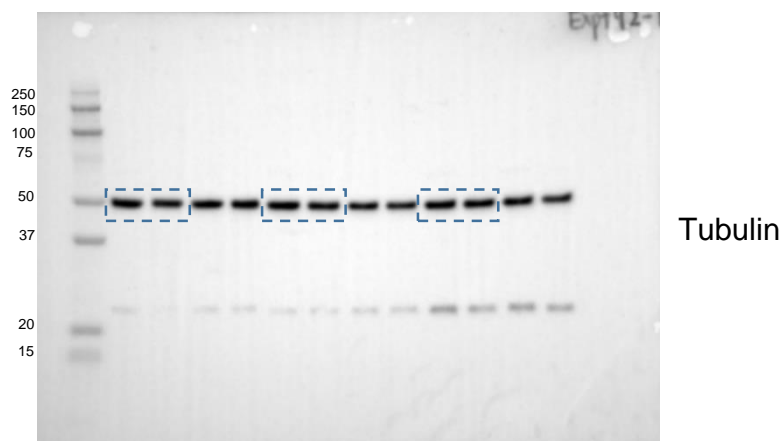

Tubulin

# Supplementary Figure 4C

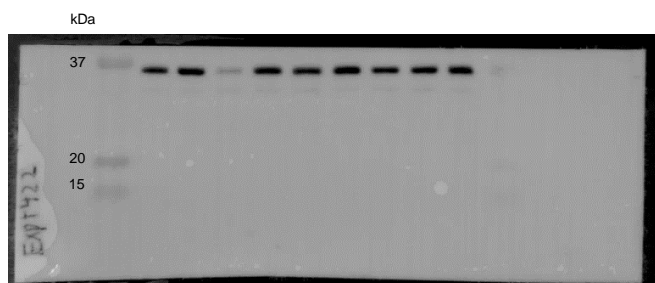

CDK6

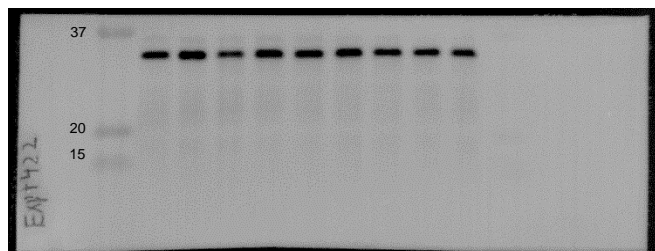

CDK4

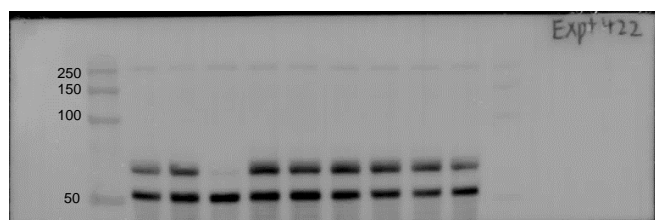

IKZF1

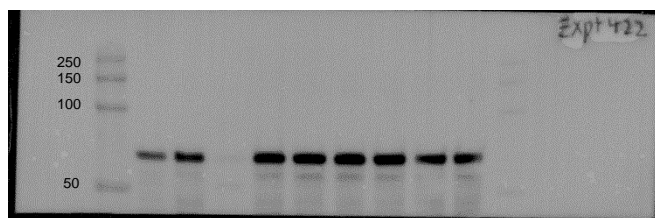

IKZF3

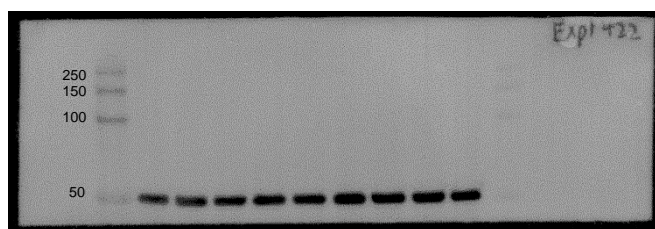

Tubulin

## Supplementary Figure 5A

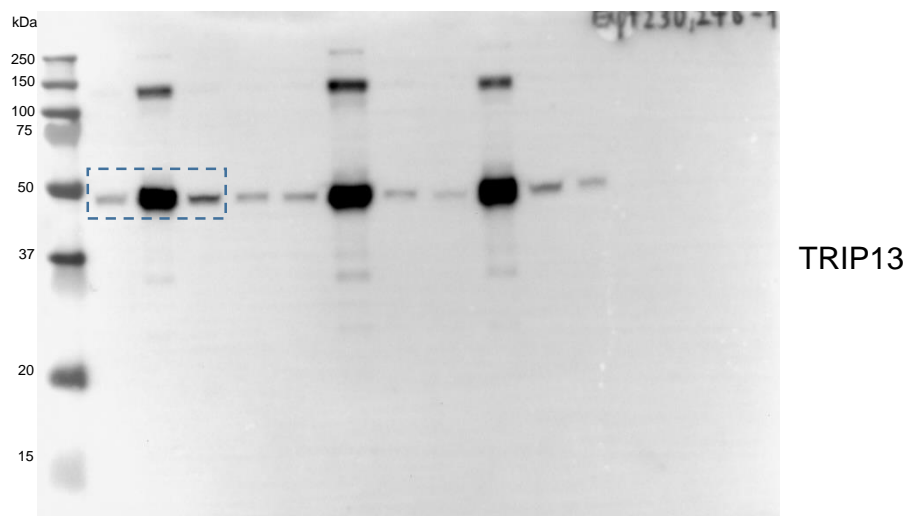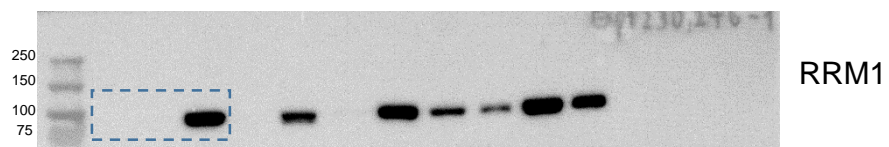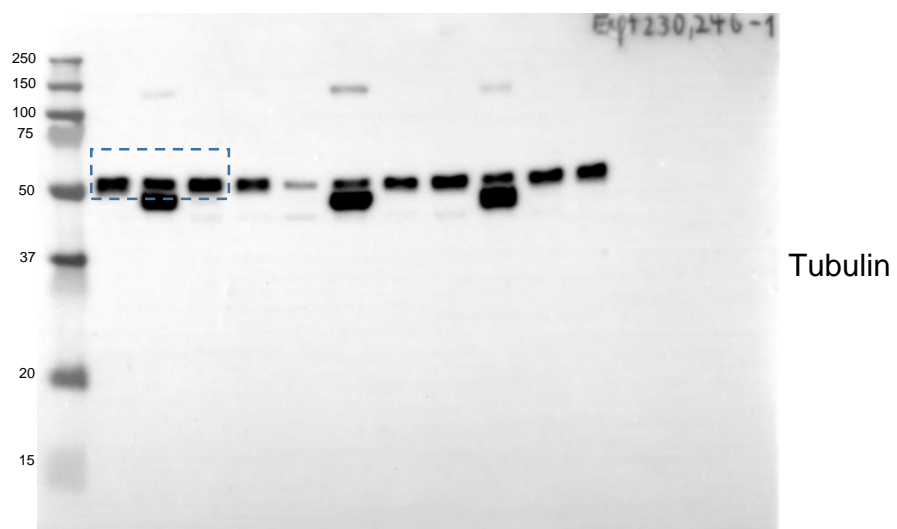

## Supplementary Figure 7B

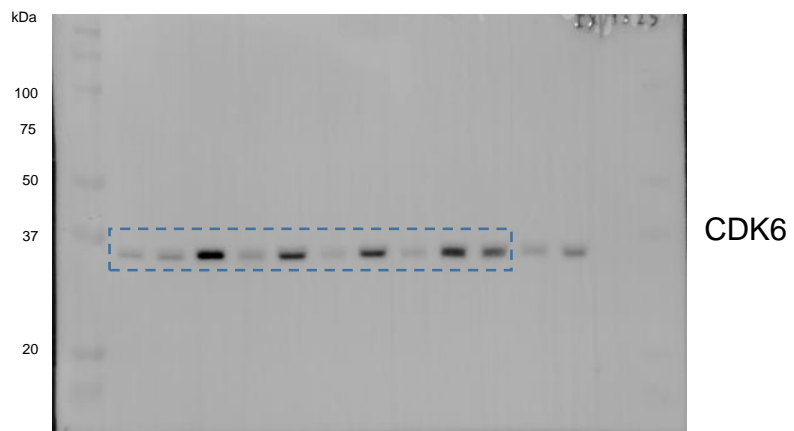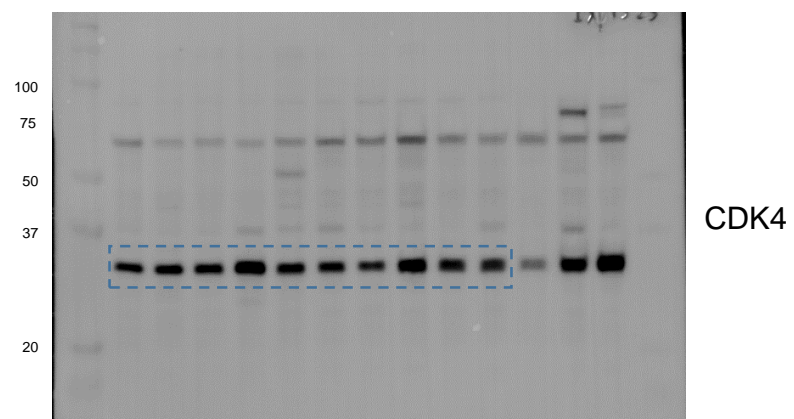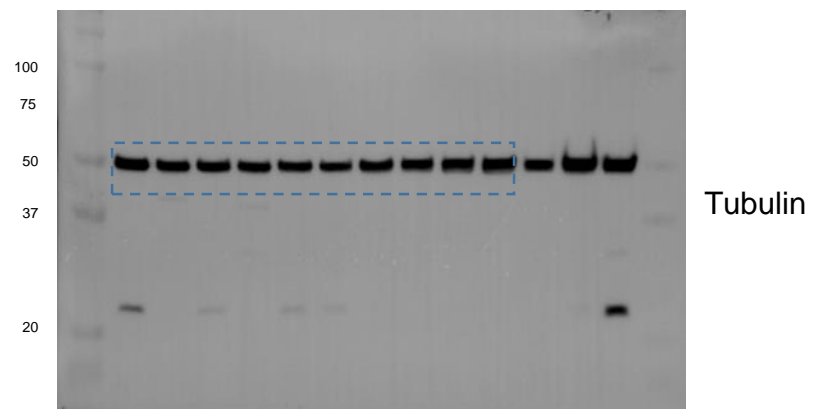

# Supplementary Figure 12A

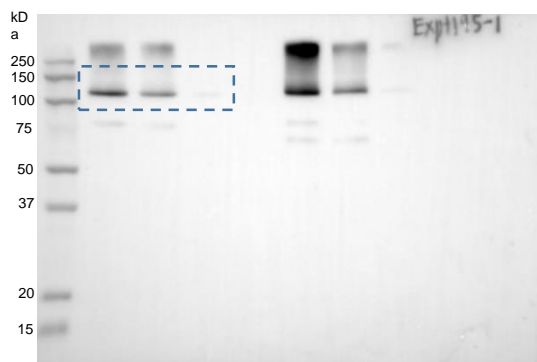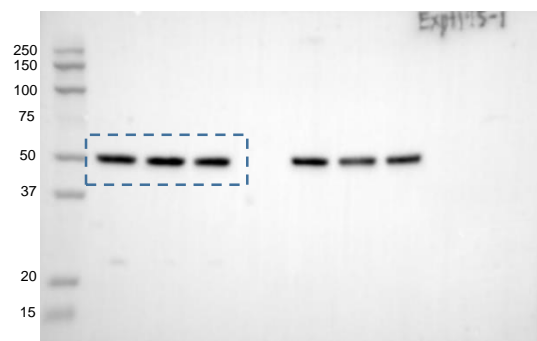

# Supplementary Figure 14A

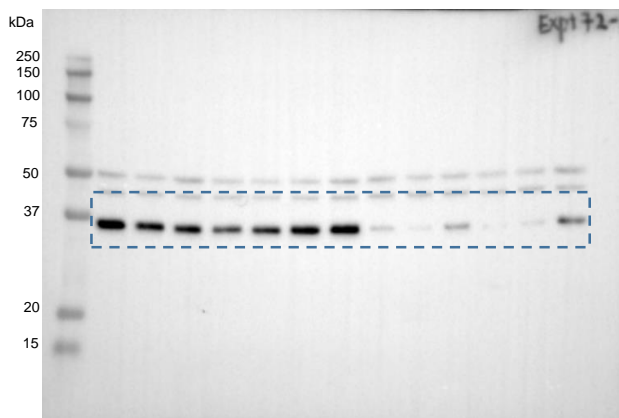

CDK6

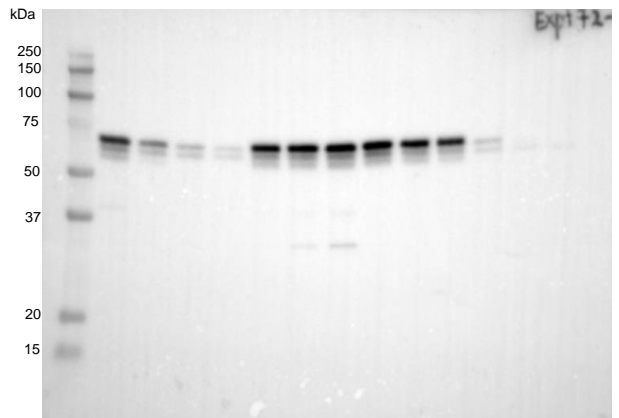

IKZF3

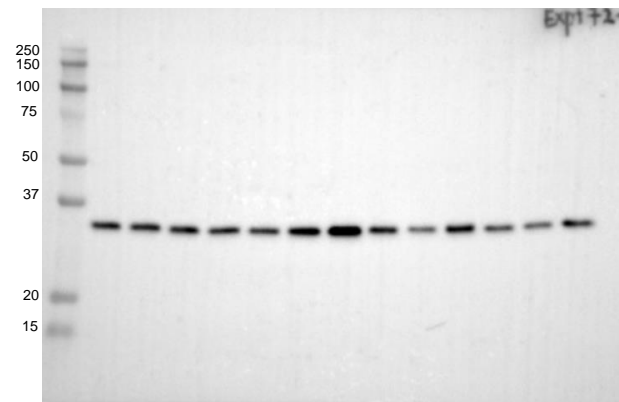

CDK4

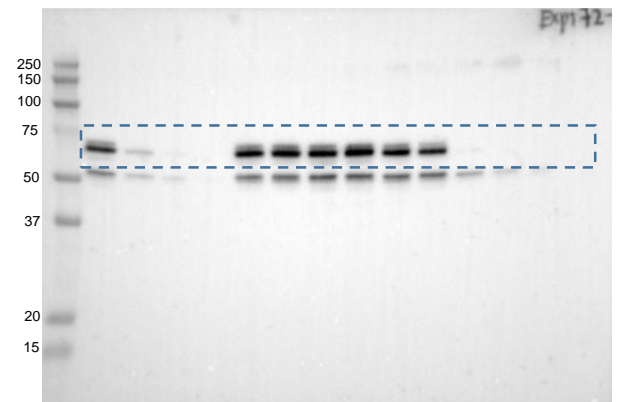

IKZF1

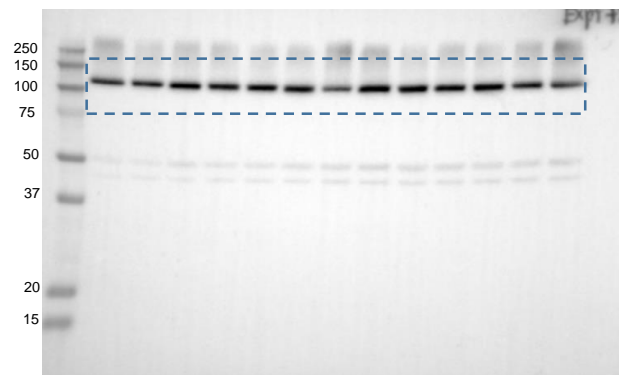

Rb

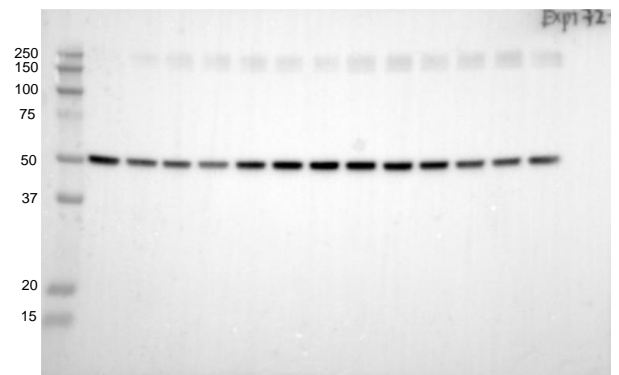

IRF4

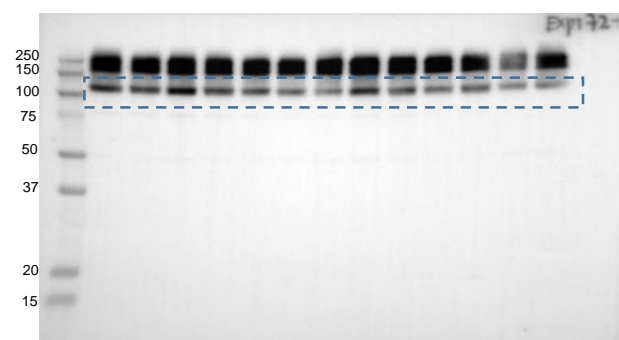

pRb  
Ser807/811

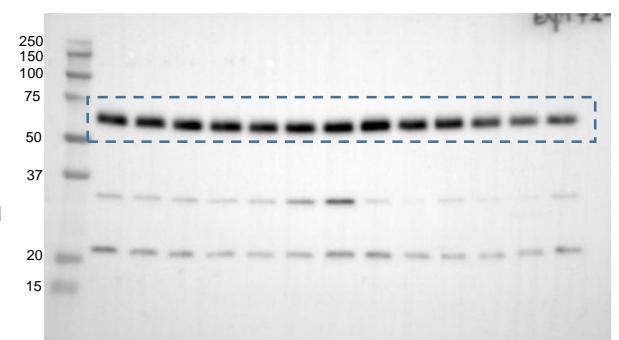

c-Myc



# Supplementary Figure 14A

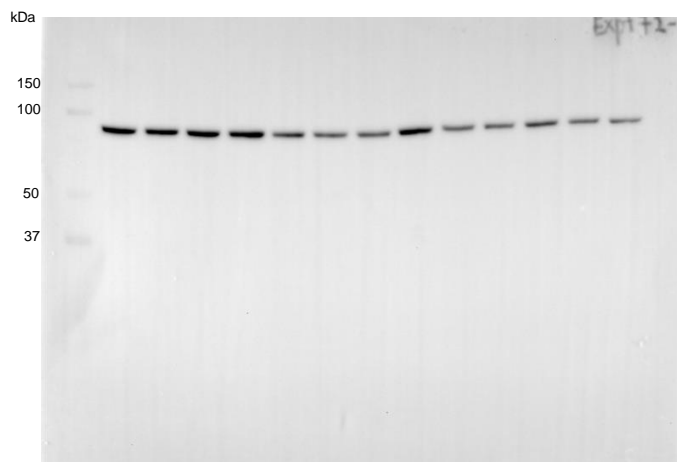

RRM1

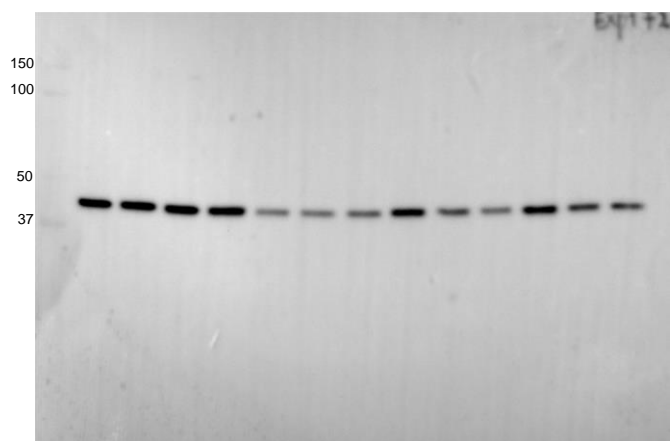

RRM2

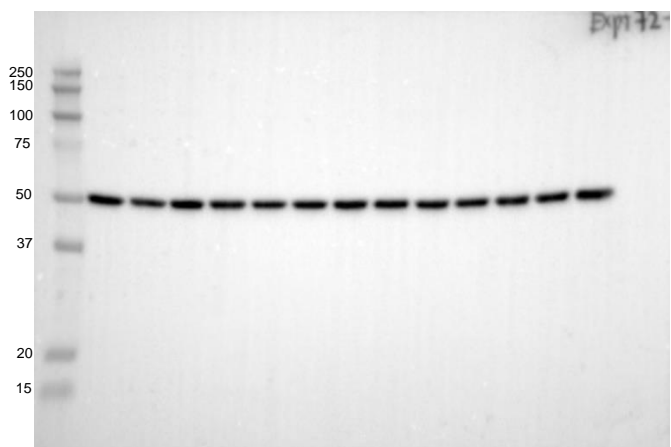

Tubulin

## Supplementary Figure 14B

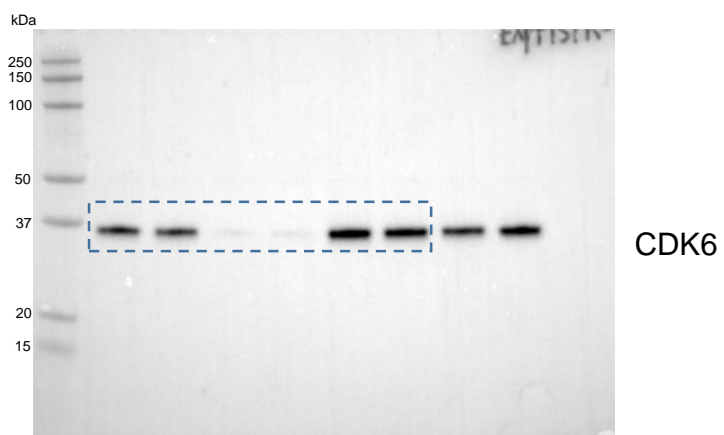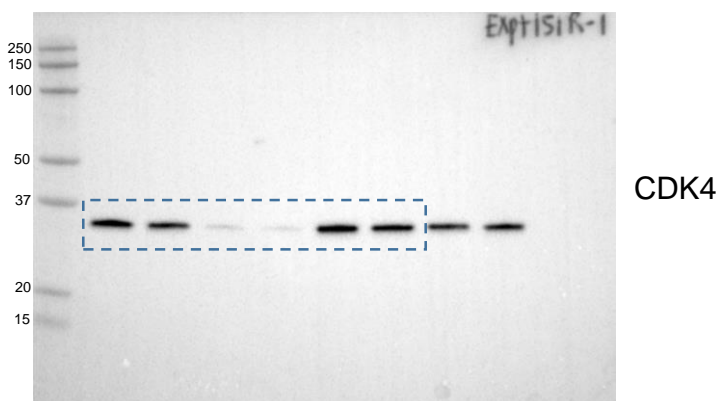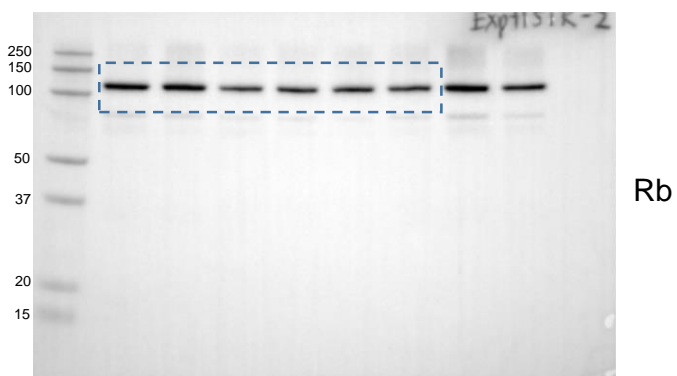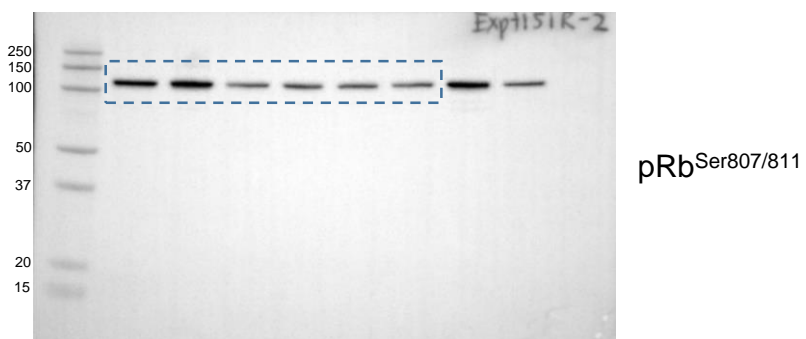

# Supplementary Figure 14B

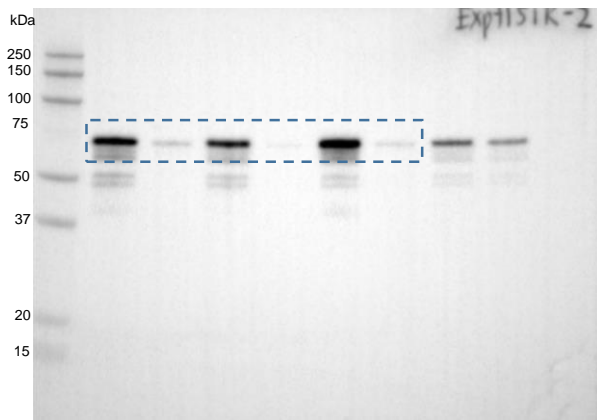

IKZF3

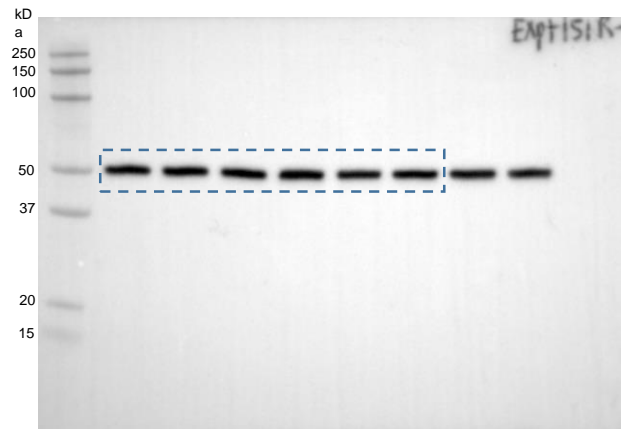

Tubulin

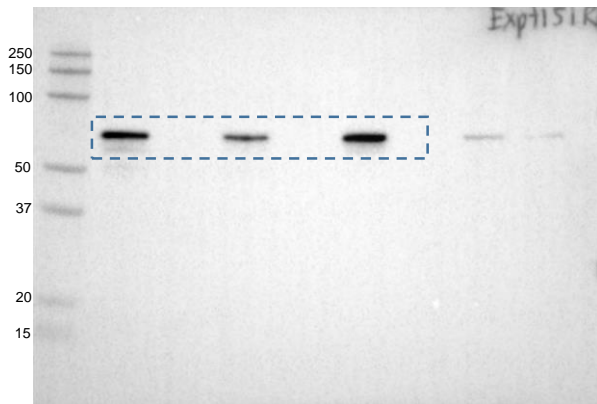

IKZF1

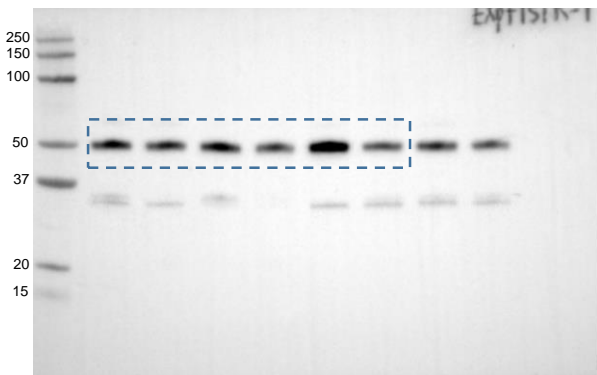

IRF4

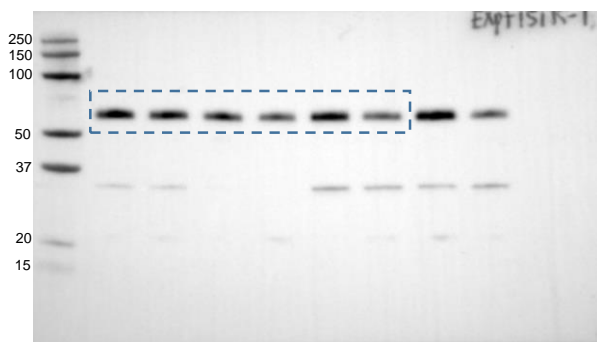

c-Myc
