# Supplementary material for: Proteomic profiling reveals CDK6 upregulation as a targetable resistance mechanism for lenalidomide in multiple myeloma
Source: PubMed Central journal article supplement (PMC8866544; doi:10.1038/s41467-022-28515-1), 2022-02-23
Supplement: 41467_2022_28515_MOESM3_ESM.pdf [file 41467_2022_28515_MOESM3_ESM.pdf]

## **Description of Additional Supplementary Files**

### **File Name: Supplementary Data 1**

Description: TMT proteomic and phosphoproteomic datasets of multiple myeloma patient samples

Sheet 1 (channel\_annotation) contains TMT channel annotations for all datasets

Sheet 2 (columns) contains column annotations for sheet 3 and 4

Sheet 3 (patient\_data\_global\_plex1) contains global proteome data for multiple myeloma patient samples

Sheet 4 (patient\_data\_global\_plex1) contains phosphoproteome data for multiple myeloma patient samples

### **File Name: Supplementary Data 2**

Description: RNAseq data of the same multiple myeloma patient samples that were also analyzed with proteomics. Gene level data of relapse to diagnosis ratios as well as log<sub>2</sub>(TPM) values and median normalized TPM values

### **File Name: Supplementary Data 3**

Description: TMT phosphoproteomic and proteomic datasets of drug treated MM1S cells

Sheet 1 (channel\_annotation) contains experimental conditions and TMT channel annotation

Sheet 2 (columns) contains column annotations for sheet 3 and 4

Sheet 3 (MM1S\_globalproteome) contains global proteome data

Sheet 4 (MM1S\_gphosphoproteome) contains phosphoproteome data

### **File Name: Supplementary Data 4**

Description: CDK6 relapse signature

Contains proteins significantly regulated at relapse and their corresponding levels in patient samples and drug treated MM1S cells (related to Figure 6B)
